# Supplementary material for: The Impact of ACEs on BMI: An Investigation of the Genotype-Environment Effects of BMI
Source: Front Genet. 2022 Mar 7;13:816660. doi: 10.3389/fgene.2022.816660 (PMC8942770; doi:10.3389/fgene.2022.816660)
Supplement: Supplementary file 2 [file Table3.xlsx]

## Sheet: RR.SigHits.Go_Aug42021
Table S3. GWAS results without ACE as environmental covariate
ID	CHROM	BP	rsID	GENE	Ref	Alt	Tested	Beta (G)	SE (G)	Pval (G)
chr1:30056920:G:A	chr1	30056920	rs1498244	LINC01648	A	G	G	1.35725	0.266107	3.42023e-07
chr1:30061365:C:T	chr1	30061365	rs452452	LINC01648	T	C	C	1.34468	0.266181	4.41649e-07
chr1:72047305:G:A	chr1	72047305	rs11209896	NEGR1	G	A	A	0.0544902	0.0101019	6.96795e-08
chr1:72047438:T:G	chr1	72047438	rs12564163	NEGR1	T	G	G	0.0544276	0.0100984	7.13831e-08
chr1:72047503:T:G	chr1	72047503	rs1905976	NEGR1	T	G	G	-0.0483289	0.0102281	2.31622e-06
chr1:72049018:G:C	chr1	72049018	rs2422134	NEGR1	G	C	C	-0.0486536	0.0100148	1.19392e-06
chr1:72050393:C:T	chr1	72050393	rs1026999	NEGR1	C	T	T	-0.0488637	0.0100996	1.32079e-06
chr1:72050397:G:T	chr1	72050397	rs1026998	NEGR1	G	T	T	-0.0492238	0.0100972	1.09712e-06
chr1:72051399:C:T	chr1	72051399	rs6657634	NEGR1	C	T	T	-0.0492283	0.0100169	8.9731e-07
chr1:72052245:A:G	chr1	72052245	rs975480	NEGR1	G	A	A	0.0556594	0.0100952	3.56276e-08
chr1:72052304:G:C	chr1	72052304	rs17580974	NEGR1	G	C	C	-0.0493017	0.0100366	9.0798e-07
chr1:72052487:A:G	chr1	72052487	rs12074700	NEGR1	A	G	G	-0.0496402	0.0100157	7.24716e-07
chr1:72052737:A:T	chr1	72052737	rs12354124/rs1318616672	NEGR1	A	T	T	-0.0491797	0.010012	9.08399e-07
chr1:72055258:T:C	chr1	72055258	rs1486084	NEGR1	T	C	C	0.0546784	0.0100864	5.99658e-08
chr1:72057288:G:A	chr1	72057288	rs11209899	NEGR1	G	A	A	0.0854293	0.0172553	7.55136e-07
chr1:72059179:T:G	chr1	72059179	rs12036443	NEGR1	T	G	G	0.0548871	0.0100991	5.54965e-08
chr1:72061691:A:G	chr1	72061691	rs2046504	NEGR1	A	G	G	-0.0488146	0.0100317	1.1476e-06
chr1:72062226:A:G	chr1	72062226	rs1564968	NEGR1	A	G	G	-0.0488485	0.0100118	1.07426e-06
chr1:72063654:C:T	chr1	72063654	rs11209900	NEGR1	C	T	T	0.0555251	0.0100821	3.69026e-08
chr1:72063879:A:AC	chr1	72063879	rs192492981/rs1553135870	NEGR1	A	AC	AC	0.0552649	0.0100758	4.18781e-08
chr1:72064183:T:C	chr1	72064183	rs12131816	NEGR1	T	C	C	0.0554181	0.0100891	4.00356e-08
chr1:72065009:T:C	chr1	72065009	rs1540616	NEGR1	T	C	C	-0.0494782	0.0100103	7.76796e-07
chr1:72065400:A:G	chr1	72065400	rs12408173	NEGR1	A	G	G	0.0543778	0.0101261	7.96222e-08
chr1:72065724:A:G	chr1	72065724	rs1159129	NEGR1	A	G	G	-0.0492565	0.0100434	9.44987e-07
chr1:72065790:A:G	chr1	72065790	rs2046503	NEGR1	A	G	G	-0.049585	0.0100317	7.76326e-07
chr1:72067993:G:A	chr1	72067993	rs12132044	NEGR1	G	A	A	0.0529276	0.0101927	2.09376e-07
chr1:72068092:C:T	chr1	72068092	rs2630381	NEGR1	T	C	C	0.0540918	0.0101791	1.0844e-07
chr1:72068860:G:A	chr1	72068860	rs2220252	NEGR1	G	A	A	0.0537465	0.0101661	1.25793e-07
chr1:72069602:T:C	chr1	72069602	rs2821266	NEGR1	C	T	T	0.053763	0.010175	1.27917e-07
chr1:72070658:T:A	chr1	72070658	rs2200484	NEGR1	T	A	A	0.0536464	0.0101777	1.37183e-07
chr1:72072742:TC:T	chr1	72072742	rs182672800/rs60934446	NEGR1	TC	T	T	-0.0480063	0.0101145	2.0869e-06
chr1:72073862:C:T	chr1	72073862	rs12409966	NEGR1	C	T	T	0.0534329	0.0101741	1.52186e-07
chr1:72074715:T:C	chr1	72074715	rs2422135	NEGR1	T	C	C	0.053731	0.0101797	1.31847e-07
chr1:72075192:T:C	chr1	72075192	rs11209905	NEGR1	T	C	C	0.0534772	0.0101736	1.48416e-07
chr1:72077055:C:T	chr1	72077055	rs12049085	NEGR1	C	T	T	0.0536373	0.0101817	1.39439e-07
chr1:72077655:A:T	chr1	72077655	rs1486108	NEGR1	A	T	T	-0.0482895	0.0101341	1.90222e-06
chr1:72078227:G:A	chr1	72078227	rs7542278	NEGR1	G	A	A	-0.04857	0.0101302	1.64258e-06
chr1:72080011:C:T	chr1	72080011	rs11209906	NEGR1	C	T	T	0.0539244	0.0101855	1.20852e-07
chr1:72081713:G:C	chr1	72081713	rs12130387	NEGR1	G	C	C	0.0529807	0.010194	2.04338e-07
chr1:72088410:C:T	chr1	72088410	rs2821260	NEGR1	T	C	C	0.0533001	0.0102411	1.96553e-07
chr1:72185242:G:T	chr1	72185242	rs6668604	NEGR1	T	G	G	-0.0472586	0.00997627	2.18307e-06
chr1:72193658:A:AT	chr1	72193658	rs989161577	NEGR1	A	AT	AT	-0.048237	0.0100237	1.50304e-06
chr1:72196666:A:AGGC	chr1	72196666	rs79323473	NEGR1	A	AGGC	AGGC	-0.0479768	0.00999083	1.5817e-06
chr1:72199263:TG:T	chr1	72199263	rs35669105	NEGR1	TG	T	T	-0.047761	0.0100017	1.80749e-06
chr1:72222820:G:A	chr1	72222820	rs1194286	NEGR1	G	A	A	-0.0480326	0.00999701	1.56133e-06
chr1:72229864:G:T	chr1	72229864	rs1205484	NEGR1	G	T	T	-0.0475524	0.00997901	1.89976e-06
chr1:72285502:T:C	chr1	72285502	rs3101336	LOC105378797	C	T	T	-0.0568304	0.0106258	8.98163e-08
chr1:72289422:C:G	chr1	72289422	rs2568952	LOC105378797	G	C	C	-0.0560679	0.0103591	6.29154e-08
chr1:72298693:T:C	chr1	72298693	rs2568956	LOC105378797	C	T	T	-0.0550456	0.0102714	8.45766e-08
chr1:72299433:G:A	chr1	72299433	rs2568958	LOC105378797	A	G	G	-0.0538835	0.0105257	3.09763e-07
chr1:72346221:G:T	chr1	72346221	rs11209948	LOC105378797	T	G	G	-0.0548915	0.010268	9.09907e-08
chr1:72346757:G:A	chr1	72346757	rs2815752	LOC105378797	A	G	G	-0.0552843	0.0103655	9.74233e-08
chr1:72347446:C:T	chr1	72347446	rs1460943	LOC105378797	T	C	C	-0.0552238	0.010268	7.60748e-08
chr1:72347573:A:T	chr1	72347573	rs1460942	LOC105378797	T	A	A	-0.0547268	0.0102703	1.00043e-07
chr1:72347977:CAA:C	chr1	72347977	rs1557631423/rs1237219166/rs987798997	LOC105378797	CAA	C	C	-0.056116	0.0106249	1.29548e-07
chr1:72353929:T:C	chr1	72353929	rs2012697	LOC105378797	C	T	T	-0.0513059	0.0102482	5.59585e-07
chr1:72359172:G:A	chr1	72359172	rs6661921	LOC105378797	A	G	G	-0.0511629	0.010245	5.9661e-07
chr1:72359177:C:T	chr1	72359177	rs6687024	LOC105378797	T	C	C	-0.0511629	0.010245	5.9661e-07
chr1:72359461:A:T	chr1	72359461	rs6699744	LOC105378797	T	A	A	-0.0513102	0.0102489	5.59284e-07
chr1:72362538:T:C	chr1	72362538	rs10889947	LOC105378797	C	T	T	-0.0512139	0.0103313	7.21292e-07
chr1:72363997:A:T	chr1	72363997	rs11209950	LOC105378797	T	A	A	-0.0506117	0.0102364	7.70452e-07
chr1:177800962:G:A	chr1	177800962	rs4478775	SEC16B*	G	A	A	0.0609365	0.0125866	1.29963e-06
chr1:177801733:C:A	chr1	177801733	rs11585009	SEC16B*	C	A	A	0.0652011	0.012518	1.92257e-07
chr1:177808956:C:T	chr1	177808956	rs12135579	SEC16B*	C	T	T	0.0656008	0.0125697	1.81832e-07
chr1:177809163:C:CT	chr1	177809163	rs1553222791	SEC16B*	C	CT	CT	0.0651525	0.012594	2.32394e-07
chr1:177810341:A:C	chr1	177810341	rs12125768	SEC16B*	A	C	C	0.059657	0.0122414	1.1059e-06
chr1:177824687:G:C	chr1	177824687	rs34166952	SEC16B*	G	C	C	0.0659459	0.0126471	1.86385e-07
chr1:177824855:C:A	chr1	177824855	rs12735595	SEC16B*	C	A	A	0.0633966	0.0126108	5.02155e-07
chr1:177825882:C:T	chr1	177825882	rs4609391	SEC16B*	C	T	T	0.0656128	0.0125717	1.81631e-07
chr1:177828212:G:C	chr1	177828212	rs72698507	SEC16B*	G	C	C	0.0647525	0.0125902	2.72809e-07
chr1:177829702:T:C	chr1	177829702	rs11586243	SEC16B*	T	C	C	0.0638855	0.0126042	4.0438e-07
chr1:177830753:T:C	chr1	177830753	rs4509539	SEC16B*	T	C	C	0.063259	0.0126251	5.47369e-07
chr1:177833257:G:A	chr1	177833257	rs12085082	SEC16B*	G	A	A	0.0618945	0.0126686	1.03889e-06
chr1:177833289:T:C	chr1	177833289	rs12736514	SEC16B*	T	C	C	0.066524	0.0126498	1.4644e-07
chr1:177833575:G:A	chr1	177833575	rs4132288	SEC16B*	G	A	A	0.0654433	0.012712	2.65612e-07
chr1:177835056:G:A	chr1	177835056	rs12760319	SEC16B*	G	A	A	0.0688557	0.012576	4.4244e-08
chr1:177835105:T:C	chr1	177835105	rs17360224	SEC16B*	T	C	C	0.0668398	0.0125578	1.03414e-07
chr1:177839607:C:T	chr1	177839607	rs1489704178/rs1815367	SEC16B*	C	T	T	0.0644254	0.0127083	4.02393e-07
chr1:177839949:C:A	chr1	177839949	rs34551500	SEC16B*	C	A	A	0.0621018	0.0125279	7.21557e-07
chr1:177839985:A:C	chr1	177839985	rs12731430	SEC16B*	A	C	C	0.0633531	0.0126775	5.86414e-07
chr1:177839998:T:C	chr1	177839998	rs12735657	SEC16B*	T	C	C	0.0621568	0.0125901	8e-07
chr1:177840425:G:C	chr1	177840425	rs10913445	SEC16B*	G	C	C	0.0621691	0.0129475	1.58602e-06
chr1:177842804:C:T	chr1	177842804	rs12737338	SEC16B*	C	T	T	0.0629035	0.0125971	5.98072e-07
chr1:177843605:T:C	chr1	177843605	rs11588039	SEC16B*	T	C	C	0.0645904	0.0126294	3.17827e-07
chr1:177843660:C:A	chr1	177843660	rs10913447	SEC16B*	C	A	A	0.0619684	0.0125653	8.21634e-07
chr1:177843766:G:C	chr1	177843766	rs111552623	SEC16B*	G	C	C	0.0629771	0.0124968	4.70906e-07
chr1:177845253:C:T	chr1	177845253	rs12064340	SEC16B*	C	T	T	0.0621782	0.0125058	6.68287e-07
chr1:177846634:G:A	chr1	177846634	rs12757638	SEC16B*	G	A	A	0.0654727	0.0127105	2.61514e-07
chr1:177846708:G:A	chr1	177846708	rs12097393	SEC16B*	G	A	A	0.062742	0.0126113	6.57765e-07
chr1:177847055:CT:C	chr1	177847055	rs34705023	SEC16B*	CT	C	C	0.064243	0.0128181	5.43721e-07
chr1:177847661:G:T	chr1	177847661	rs36055936	SEC16B*	G	T	T	0.0640692	0.0126993	4.57357e-07
chr1:177848531:C:T	chr1	177848531	rs12730934	SEC16B*	C	T	T	0.0628247	0.0127029	7.64893e-07
chr1:177864441:C:T	chr1	177864441	rs4142027	SEC16B*	C	T	T	0.062322	0.0128685	1.28881e-06
chr1:177866503:C:T	chr1	177866503	rs34472009	SEC16B*	C	T	T	0.0632406	0.0129332	1.01766e-06
chr1:177872550:C:T	chr1	177872550	rs6670873	SEC16B*	C	T	T	0.0696536	0.0137656	4.23666e-07
chr1:177874344:C:T	chr1	177874344	rs2094510	SEC16B*	C	T	T	0.0705312	0.0134378	1.54908e-07
chr1:177883445:T:C	chr1	177883445	rs633715	SEC16B*	T	C	C	0.0696319	0.012519	2.69999e-08
chr1:177886382:C:A	chr1	177886382	rs516636	SEC16B*	C	A	A	0.0697239	0.0125446	2.76247e-08
chr1:177895001:T:A	chr1	177895001	rs1336780	SEC16B*	A	T	T	0.0549902	0.0114403	1.54557e-06
chr1:177899747:G:T	chr1	177899747	rs527065	SEC16B*	G	T	T	0.0522587	0.0107262	1.11299e-06
chr1:177899855:G:A	chr1	177899855	rs670323	SEC16B*	G	A	A	0.0696248	0.0124942	2.54252e-08
chr1:177900152:T:C	chr1	177900152	rs671596	SEC16B*	T	C	C	0.0533845	0.0107411	6.74742e-07
chr1:177900455:A:C	chr1	177900455	rs533543	SEC16B*	A	C	C	0.0524131	0.0107796	1.16964e-06
chr1:177900806:A:G	chr1	177900806	rs685233	SEC16B*	A	G	G	0.0536415	0.0107522	6.1253e-07
chr1:177902751:T:C	chr1	177902751	rs623130	SEC16B*	T	C	C	0.0535219	0.0107434	6.35132e-07
chr1:177903770:G:A	chr1	177903770	rs571567	SEC16B*	G	A	A	0.0724513	0.0126775	1.11341e-08
chr1:177904075:G:T	chr1	177904075	rs574367	SEC16B*	G	T	T	0.080017	0.014101	1.41452e-08
chr1:177904706:G:A	chr1	177904706	rs490689	SEC16B*	G	A	A	0.0718495	0.0125167	9.58924e-09
chr1:177906379:A:G	chr1	177906379	rs527248	SEC16B*	A	G	G	0.0717406	0.0125093	9.89484e-09
chr1:177906824:GCTA:G	chr1	177906824	rs3075558	SEC16B*	GCTA	G	G	0.0720592	0.012543	9.33022e-09
chr1:177907811:C:T	chr1	177907811	rs589500	SEC16B*	C	T	T	0.0704798	0.0125805	2.14387e-08
chr1:177909798:G:A	chr1	177909798	rs532504	SEC16B*	G	A	A	0.0684077	0.0125067	4.56291e-08
chr1:177912289:G:A	chr1	177912289	rs1266155	SEC16B*	G	A	A	0.0735833	0.0127331	7.63604e-09
chr1:177912516:C:G	chr1	177912516	rs693232	SEC16B*	C	G	G	0.0682244	0.0126228	6.56291e-08
chr1:177913651:C:T	chr1	177913651	rs585944	SEC16B*	C	T	T	0.0644262	0.0120041	8.09647e-08
chr1:177916627:G:A	chr1	177916627	rs630372	SEC16B*	G	A	A	0.0651307	0.011991	5.64975e-08
chr1:177917883:T:C	chr1	177917883	rs478788	SEC16B*	T	C	C	0.0667971	0.0119691	2.42575e-08
chr1:177919294:T:C	chr1	177919294	rs512898	SEC16B*	T	C	C	0.0528081	0.0111043	1.99366e-06
chr1:177919890:A:C	chr1	177919890	rs986918918/rs539515	SEC16B*	A	C	C	0.0700428	0.0126954	3.48834e-08
chr1:177920345:A:G	chr1	177920345	rs543874	SEC16B*	A	G	G	0.0724274	0.0126217	9.70153e-09
chr1:177925152:T:C	chr1	177925152	rs506589	SEC16B*	T	C	C	0.0730056	0.0126366	7.70323e-09
chr1:177925456:T:G	chr1	177925456	rs509325	SEC16B*	T	G	G	0.0743175	0.0125992	3.72563e-09
chr1:177928840:C:T	chr1	177928840	rs8030	SEC16B/CRYZL2P	C	T	T	0.0547588	0.0110054	6.55871e-07
chr1:177929986:G:C	chr1	177929986	rs545608	SEC16B/CRYZL2P	G	C	C	0.0751501	0.0157558	1.86487e-06
chr1:177944384:T:C	chr1	177944384	rs10913469	SEC16B/CRYZL2P	T	C	C	0.0740133	0.0126428	4.86933e-09
chr2:610603:T:C	chr2	610603	rs2867131	TMEM-18*	C	T	T	-0.0723622	0.014518	6.27656e-07
chr2:612364:C:T	chr2	612364	rs7601009	TMEM-18*	T	C	C	-0.0519222	0.010527	8.19339e-07
chr2:613154:C:T	chr2	613154	rs4318419	TMEM-18*	T	C	C	-0.0538827	0.0104291	2.40723e-07
chr2:613290:T:G	chr2	613290	rs2903495	TMEM-18*	G	T	T	-0.0540276	0.0104284	2.23103e-07
chr2:613516:G:A	chr2	613516	rs2947413	TMEM-18*	A	G	G	-0.0532656	0.0104441	3.42671e-07
chr2:613571:T:C	chr2	613571	rs2966403	TMEM-18*	C	T	T	-0.0538463	0.0104341	2.48558e-07
chr2:613731:C:CA	chr2	613731	rs1434888227/rs34017538	TMEM-18*	CA	C	C	-0.0532111	0.0104678	3.74322e-07
chr2:613782:T:C	chr2	613782	rs2966402	TMEM-18*	C	T	T	-0.0551346	0.0105348	1.68031e-07
chr2:613838:A:G	chr2	613838	rs2947412	TMEM-18*	G	A	A	-0.0568002	0.0106715	1.0349e-07
chr2:613869:G:A	chr2	613869	rs2966401	TMEM-18*	A	G	G	-0.0534091	0.010797	7.6177e-07
chr2:613883:G:A	chr2	613883	rs2966400	TMEM-18*	A	G	G	-0.0544585	0.0108392	5.10418e-07
chr2:614168:A:G	chr2	614168	rs2947411	TMEM-18*	G	A	A	-0.0742667	0.0135021	3.84038e-08
chr2:614578:A:G	chr2	614578	rs2966399	TMEM-18*	G	A	A	-0.0544359	0.0105283	2.35923e-07
chr2:614885:ATCTT:A	chr2	614885	rs190581071/rs1553334682/rs10606290	TMEM-18*	A	ATCTT	ATCTT	-0.0549941	0.0104361	1.38151e-07
chr2:614998:A:G	chr2	614998	rs6709992	TMEM-18*	G	A	A	-0.0540361	0.0104534	2.37387e-07
chr2:615114:GAGAC:G	chr2	615114	rs183910185/rs869294872/rs10606291/rs764375914	TMEM-18*	G	GAGAC	GAGAC	-0.0539937	0.0104504	2.40671e-07
chr2:615140:T:C	chr2	615140	rs7567570	TMEM-18*	C	T	T	-0.0728681	0.0133524	4.89313e-08
chr2:615218:C:T	chr2	615218	rs6548236	TMEM-18*	T	C	C	-0.0548604	0.0104371	1.48554e-07
chr2:615263:A:ATT	chr2	615263	rs10676932	TMEM-18*	ATT	A	A	-0.0540312	0.0104539	2.38222e-07
chr2:615627:C:T	chr2	615627	rs7559547	TMEM-18*	T	C	C	-0.0732462	0.0132413	3.21305e-08
chr2:616010:T:C	chr2	616010	rs7571168	TMEM-18*	C	T	T	-0.0542992	0.0104377	1.98912e-07
chr2:616168:G:T	chr2	616168	rs7605313	TMEM-18*	T	G	G	-0.0543342	0.010419	1.85752e-07
chr2:616504:A:ATTACT	chr2	616504	rs1553334758	TMEM-18*	ATTACT	A	A	-0.0540061	0.0104355	2.29824e-07
chr2:616686:T:C	chr2	616686	rs7571872	TMEM-18*	C	T	T	-0.0547335	0.0104458	1.6245e-07
chr2:617048:T:A	chr2	617048	rs4854268	TMEM-18*	A	T	T	-0.0540339	0.0104445	2.321e-07
chr2:617121:T:C	chr2	617121	rs4854327	TMEM-18*	C	T	T	-0.0543193	0.0104732	2.16399e-07
chr2:617150:T:C	chr2	617150	rs4854328	TMEM-18*	C	T	T	-0.0537968	0.0105675	3.59961e-07
chr2:617176:C:G	chr2	617176	rs4854329	TMEM-18*	G	C	C	-0.0539441	0.0105263	3.00918e-07
chr2:617190:C:G	chr2	617190	rs4854269	TMEM-18*	G	C	C	-0.0538683	0.0105277	3.137e-07
chr2:617394:A:G	chr2	617394	rs11685767	TMEM-18*	G	A	A	-0.0541845	0.0104293	2.06305e-07
chr2:617621:G:A	chr2	617621	rs4854331	TMEM-18*	A	G	G	-0.0530328	0.0104536	3.94768e-07
chr2:618002:T:C	chr2	618002	rs7578764	TMEM-18*	C	T	T	-0.0536707	0.0104372	2.74051e-07
chr2:618027:T:C	chr2	618027	rs4854332	TMEM-18*	C	T	T	-0.0535173	0.0104361	2.95457e-07
chr2:618104:G:GATCA	chr2	618104	rs10684649	TMEM-18*	GATCA	G	G	-0.0543548	0.0104246	1.86573e-07
chr2:618360:A:C	chr2	618360	rs7575831	TMEM-18*	C	A	A	-0.0542387	0.0104274	1.99582e-07
chr2:618361:G:A	chr2	618361	rs34043853/rs7560005	TMEM-18*	A	G	G	-0.0541531	0.0104265	2.08077e-07
chr2:618966:C:T	chr2	618966	rs2903493	TMEM-18*	T	C	C	-0.0541161	0.0104704	2.38329e-07
chr2:618973:T:A	chr2	618973	rs2867126	TMEM-18*	A	T	T	-0.053866	0.0104632	2.65644e-07
chr2:619056:G:A	chr2	619056	rs5016125	TMEM-18*	A	G	G	-0.0537552	0.0104491	2.70814e-07
chr2:621185:T:C	chr2	621185	rs1436558881/rs7570232	TMEM-18*	C	T	T	-0.0683334	0.0139117	9.09537e-07
chr2:621558:C:T	chr2	621558	rs939584	TMEM-18*	T	C	C	-0.0821253	0.0165134	6.67064e-07
chr2:621602:G:GT	chr2	621602	rs186385463/rs5828773	TMEM-18*	GT	G	G	-0.0852099	0.0158703	8.03912e-08
chr2:621910:A:C	chr2	621910	rs6717005	TMEM-18*	C	A	A	-0.0701142	0.0135159	2.15224e-07
chr2:621954:T:C	chr2	621954	rs1320332	TMEM-18*	C	T	T	-0.0711984	0.0134888	1.31766e-07
chr2:622161:G:C	chr2	622161	rs1320331	TMEM-18*	C	G	G	-0.0740578	0.0133665	3.05413e-08
chr2:622225:T:G	chr2	622225	rs1320330	TMEM-18*	G	T	T	-0.0730999	0.0133945	4.88848e-08
chr2:622531:C:T	chr2	622531	rs939583	TMEM-18*	T	C	C	-0.0701978	0.0136912	2.96964e-07
chr2:622827:T:C	chr2	622827	rs2867125	TMEM-18*	C	T	T	-0.072549	0.0136432	1.06382e-07
chr2:622857:A:G	chr2	622857	rs2867124	TMEM-18*	G	A	A	-0.0723994	0.0138173	1.62615e-07
chr2:623212:T:C	chr2	623212	rs4854339	TMEM-18*	C	T	T	-0.0806112	0.0143585	2.0048e-08
chr2:623216:G:A	chr2	623216	rs4854340	TMEM-18*	A	G	G	-0.078856	0.0143497	3.95454e-08
chr2:623224:C:T	chr2	623224	rs939581	TMEM-18*	T	C	C	-0.0790964	0.0143156	3.33842e-08
chr2:623935:C:T	chr2	623935	rs6719518	TMEM-18*	T	C	C	-0.0735893	0.0133005	3.19118e-08
chr2:623976:T:C	chr2	623976	rs6728726	TMEM-18*	C	T	T	-0.0726817	0.0132612	4.28584e-08
chr2:624034:G:C	chr2	624034	rs6711012	TMEM-18*	C	G	G	-0.0740952	0.0132454	2.24755e-08
chr2:624205:T:G	chr2	624205	rs6731872	TMEM-18*	G	T	T	-0.0817835	0.0152434	8.19708e-08
chr2:624210:G:A	chr2	624210	rs6711254	TMEM-18*	A	G	G	-0.0767612	0.0151532	4.11416e-07
chr2:624678:G:A	chr2	624678	rs2903492	TMEM-18*	A	G	G	-0.0814658	0.0146788	2.90402e-08
chr2:625029:C:T	chr2	625029	rs7576624	TMEM-18*	T	C	C	-0.0737401	0.0135412	5.22526e-08
chr2:625057:C:T	chr2	625057	rs7576635/rs112863468	TMEM-18*	T	C	C	-0.0739807	0.0135066	4.37097e-08
chr2:625347:T:C	chr2	625347	rs12476198	TMEM-18*	C	T	T	-0.0745815	0.0135046	3.38148e-08
chr2:628524:A:G	chr2	628524	rs6744653	TMEM-18*	G	A	A	-0.0689043	0.0141946	1.21843e-06
chr2:628749:C:T	chr2	628749	rs6739303	TMEM-18*	T	C	C	-0.0796948	0.013989	1.23889e-08
chr2:629510:C:A	chr2	629510	rs6743060	TMEM-18*	A	C	C	-0.0756251	0.0140284	7.09994e-08
chr2:629601:A:G	chr2	629601	rs6748821	TMEM-18*	G	A	A	-0.072237	0.0136199	1.14676e-07
chr2:629694:T:A	chr2	629694	rs6752470	TMEM-18*	A	T	T	-0.0761934	0.0134697	1.56514e-08
chr2:629771:TTATC:T	chr2	629771	rs1558388646	TMEM-18*	T	TTATC	TTATC	-0.0744827	0.0133578	2.49403e-08
chr2:629791:TTGATAGATAA:T	chr2	629791	rs1558388677	TMEM-18*	T	TTGATAGATAA	TTGATAGATAA	-0.0743119	0.0133382	2.56085e-08
chr2:629817:G:C	chr2	629817	rs6732341	TMEM-18*	C	G	G	-0.0740551	0.0133396	2.86863e-08
chr2:629818:A:T	chr2	629818	rs71392526/rs6749087	TMEM-18*	T	A	A	-0.0738227	0.0133384	3.15922e-08
chr2:629831:T:C	chr2	629831	rs6752706	TMEM-18*	C	T	T	-0.0737412	0.0133838	3.63847e-08
chr2:629861:C:CATCT	chr2	629861	rs201022081	TMEM-18*	CATCT	C	C	-0.0751777	0.0133643	1.87764e-08
chr2:629881:T:C	chr2	629881	rs12995480	TMEM-18*	C	T	T	-0.0745344	0.013389	2.62766e-08
chr2:629914:G:A	chr2	629914	rs6732471	TMEM-18*	A	G	G	-0.072939	0.0133811	5.0716e-08
chr2:629959:T:C	chr2	629959	rs12995666	TMEM-18*	C	T	T	-0.0741344	0.0134001	3.19952e-08
chr2:630024:A:C	chr2	630024	rs13007080	TMEM-18*	C	A	A	-0.0708175	0.0136618	2.1982e-07
chr2:630034:A:T	chr2	630034	rs386642147/rs13007086	TMEM-18*	T	A	A	-0.0702206	0.0136649	2.79262e-07
chr2:630070:T:C	chr2	630070	rs66906321	TMEM-18*	C	T	T	-0.0693721	0.0138079	5.10559e-07
chr2:630075:C:T	chr2	630075	rs73139123	TMEM-18*	T	C	C	-0.0691913	0.0135994	3.65561e-07
chr2:630089:A:ATCTATAATCTATCTCTATG	chr2	630089	rs71415991/rs112843179	TMEM-18*	ATCTATAATCTATCTCTATG	A	A	-0.069985	0.0135837	2.6005e-07
chr2:630113:C:T	chr2	630113	rs12997450	TMEM-18*	T	C	C	-0.0691687	0.0136241	3.87081e-07
chr2:630224:A:T	chr2	630224	rs6731225	TMEM-18*	T	A	A	-0.0738288	0.0134108	3.73453e-08
chr2:630323:C:A	chr2	630323	rs6725549	TMEM-18*	A	C	C	-0.0747403	0.0133995	2.46708e-08
chr2:630339:A:C	chr2	630339	rs6731348	TMEM-18*	C	A	A	-0.0742386	0.0134012	3.06855e-08
chr2:630436:C:A	chr2	630436	rs6725686	TMEM-18*	A	C	C	-0.0731991	0.0133967	4.7126e-08
chr2:630509:T:C	chr2	630509	rs6735024	TMEM-18*	C	T	T	-0.0739276	0.0133542	3.13553e-08
chr2:630553:GA:G	chr2	630553	rs11302226/rs1553335805/rs35403740	TMEM-18*	G	GA	GA	-0.0746599	0.0133433	2.23169e-08
chr2:630555:A:G	chr2	630555	rs1553335805/rs115910474	TMEM-18*	G	A	A	-0.0743833	0.0133486	2.54558e-08
chr2:630569:T:C	chr2	630569	rs6735049	TMEM-18*	C	T	T	-0.0735357	0.0133618	3.77127e-08
chr2:630662:A:C	chr2	630662	rs6731688	TMEM-18*	C	A	A	-0.0733536	0.0133984	4.43382e-08
chr2:630782:G:A	chr2	630782	rs1367287205/rs13028737	TMEM-18*	A	G	G	-0.0737532	0.0133559	3.39102e-08
chr2:630788:A:G	chr2	630788	rs13008590	TMEM-18*	G	A	A	-0.0737532	0.0133559	3.39102e-08
chr2:630864:TTTAA:T	chr2	630864	rs113878957	TMEM-18*	T	TTTAA	TTTAA	-0.0721424	0.0137434	1.54532e-07
chr2:630902:A:T	chr2	630902	rs5017305	TMEM-18*	T	A	A	-0.0738853	0.0133425	3.10598e-08
chr2:630903:A:G	chr2	630903	rs879736954/rs1553335847/rs66553418/rs5017304/rs202116406	TMEM-18*	G	A	A	-0.0735984	0.0133493	3.56582e-08
chr2:630995:T:G	chr2	630995	rs5017303/rs1558389059	TMEM-18*	G	T	T	-0.0735355	0.0135968	6.43816e-08
chr2:631069:G:A	chr2	631069	rs1558389080/rs5017302/rs71415993	TMEM-18*	A	G	G	-0.0732774	0.0133692	4.27995e-08
chr2:631071:AT:A	chr2	631071	rs184254577/rs5828777	TMEM-18*	A	AT	AT	-0.073596	0.0133466	3.54696e-08
chr2:631096:G:A	chr2	631096	rs5017301	TMEM-18*	A	G	G	-0.0738211	0.0133571	3.30353e-08
chr2:631099:C:G	chr2	631099	rs5017300	TMEM-18*	G	C	C	-0.0737141	0.0133576	3.46205e-08
chr2:631165:TA:T	chr2	631165	rs5828778	TMEM-18*	T	TA	TA	-0.0733057	0.0133446	3.99387e-08
chr2:631183:C:A	chr2	631183	rs7579427	TMEM-18*	A	C	C	-0.0719211	0.0133557	7.32511e-08
chr2:631255:T:C	chr2	631255	rs7588007	TMEM-18*	C	T	T	-0.0740535	0.0133542	2.97164e-08
chr2:631335:G:T	chr2	631335	rs7569102	TMEM-18*	T	G	G	-0.0746022	0.0133691	2.43398e-08
chr2:631396:T:TA	chr2	631396	rs11387790	TMEM-18*	TA	T	T	-0.0741858	0.0133657	2.8855e-08
chr2:631462:G:A	chr2	631462	rs7569210	TMEM-18*	A	G	G	-0.0735481	0.0133792	3.90675e-08
chr2:631528:A:G	chr2	631528	rs7585056	TMEM-18*	G	A	A	-0.0762647	0.0133829	1.22467e-08
chr2:631603:C:T	chr2	631603	rs7579971	TMEM-18*	T	C	C	-0.0738435	0.013343	3.16532e-08
chr2:631606:A:G	chr2	631606	rs796258679/rs10865548	TMEM-18*	G	A	A	-0.0738992	0.0133429	3.09049e-08
chr2:631759:G:A	chr2	631759	rs10865549	TMEM-18*	A	G	G	-0.0705663	0.0147511	1.73461e-06
chr2:632028:C:T	chr2	632028	rs11127485	TMEM-18*	T	C	C	-0.0838416	0.0165443	4.08458e-07
chr2:632300:G:T	chr2	632300	rs12992154	TMEM-18*	T	G	G	-0.0869086	0.0160615	6.37644e-08
chr2:632348:A:G	chr2	632348	rs13021737	TMEM-18*	G	A	A	-0.0781182	0.0149367	1.71762e-07
chr2:632379:T:G	chr2	632379	rs13027828	TMEM-18*	G	T	T	-0.0868599	0.0155613	2.42368e-08
chr2:632529:T:C	chr2	632529	rs13028252	TMEM-18*	C	T	T	-0.0779975	0.0140871	3.12282e-08
chr2:632536:A:G	chr2	632536	rs13022164	TMEM-18*	G	A	A	-0.0780162	0.0140379	2.77406e-08
chr2:632550:C:T	chr2	632550	rs13012571	TMEM-18*	T	C	C	-0.071619	0.013893	2.56136e-07
chr2:632578:AT:A	chr2	632578	rs1425950903	TMEM-18*	A	AT	AT	-0.0709574	0.013554	1.66553e-07
chr2:632591:T:C	chr2	632591	rs13028310	TMEM-18*	C	T	T	-0.0718148	0.0135195	1.09656e-07
chr2:632592:G:A	chr2	632592	rs370195506/rs12992672	TMEM-18*	A	G	G	-0.0723304	0.0135171	8.84513e-08
chr2:632609:A:G	chr2	632609	rs13022337	TMEM-18*	G	A	A	-0.0669694	0.0136936	1.01373e-06
chr2:632723:C:T	chr2	632723	rs13013021	TMEM-18*	T	C	C	-0.0743467	0.0134538	3.3162e-08
chr2:632760:T:C	chr2	632760	rs34119520	TMEM-18*	C	T	T	-0.0754119	0.0134316	1.99769e-08
chr2:632789:C:CTTG	chr2	632789	rs185074935/rs1553336031	TMEM-18*	CTTG	C	C	-0.0741417	0.0136065	5.12804e-08
chr2:632808:G:T	chr2	632808	rs12993295	TMEM-18*	T	G	G	-0.0746589	0.0134484	2.86928e-08
chr2:632904:A:G	chr2	632904	rs35802221	TMEM-18*	G	A	A	-0.0709619	0.0137738	2.6035e-07
chr2:632922:G:A	chr2	632922	rs62105303	TMEM-18*	A	G	G	-0.0707199	0.0137026	2.47964e-07
chr2:632925:A:G	chr2	632925	rs62105304	TMEM-18*	G	A	A	-0.0695434	0.0136548	3.55835e-07
chr2:632940:T:TCA	chr2	632940	rs200883915/rs77611399	TMEM-18*	TCA	T	T	-0.0693798	0.0136748	3.94081e-07
chr2:633053:A:AC	chr2	633053	rs143684747	TMEM-18*	AC	A	A	-0.0733637	0.0133448	3.8989e-08
chr2:633055:A:T	chr2	633055	rs1558389567/rs1553336050/rs374892365	TMEM-18*	T	A	A	-0.0736845	0.0133574	3.50385e-08
chr2:633063:G:A	chr2	633063	rs1553336052/rs74676797	TMEM-18*	A	G	G	-0.0746914	0.013395	2.49264e-08
chr2:633079:AT:A	chr2	633079	rs201215061	TMEM-18*	A	AT	AT	-0.0736507	0.013387	3.80952e-08
chr2:633659:T:C	chr2	633659	rs13035713	TMEM-18*	C	T	T	-0.0751614	0.0133685	1.91005e-08
chr2:633660:C:T	chr2	633660	rs62105306	TMEM-18*	T	C	C	-0.0750565	0.0133679	1.99567e-08
chr2:633661:A:G	chr2	633661	rs35543182/rs62105307/rs371621220	TMEM-18*	G	A	A	-0.0753052	0.0133722	1.81107e-08
chr2:634476:G:C	chr2	634476	rs4854342	TMEM-18*	C	G	G	-0.0730219	0.0136385	8.69701e-08
chr2:634905:T:C	chr2	634905	rs6548238	TMEM-18*	C	T	T	-0.0766706	0.0140771	5.20584e-08
chr2:635154:G:A	chr2	635154	rs6548239	TMEM-18*	A	G	G	-0.0781683	0.0144864	6.90537e-08
chr2:635200:G:A	chr2	635200	rs6734363	TMEM-18*	A	G	G	-0.0819957	0.0139139	3.85761e-09
chr2:635607:TA:T	chr2	635607	rs1406242825	TMEM-18*	T	TA	TA	-0.0784412	0.014881	1.37317e-07
chr2:635629:ATATAT:A	chr2	635629	rs1558390092/rs10530070	TMEM-18*	A	ATATAT	ATATAT	-0.0792467	0.0152826	2.18246e-07
chr2:635721:T:C	chr2	635721	rs6755502	TMEM-18*	C	T	T	-0.0818973	0.0153863	1.03734e-07
chr2:636017:C:T	chr2	636017	rs6749375	TMEM-18*	T	C	C	-0.0705356	0.0135955	2.14538e-07
chr2:636790:T:C	chr2	636790	rs35142762	TMEM-18*	T	C	C	-0.0721186	0.0135239	9.78576e-08
chr2:636819:C:A	chr2	636819	rs35796073	TMEM-18*	C	A	A	-0.0744089	0.0134707	3.36011e-08
chr2:636929:C:A	chr2	636929	rs6548240	TMEM-18*	A	C	C	-0.0745522	0.0135014	3.39803e-08
chr2:637498:C:A	chr2	637498	rs13387939	TMEM-18*	A	C	C	-0.0725085	0.013495	7.83357e-08
chr2:637508:T:C	chr2	637508	rs13396119	TMEM-18*	C	T	T	-0.0732134	0.0134995	5.91707e-08
chr2:637597:C:T	chr2	637597	rs13388043	TMEM-18*	T	C	C	-0.0785169	0.013512	6.31041e-09
chr2:637830:A:G	chr2	637830	rs13393304	TMEM-18*	G	A	A	-0.0693466	0.0137897	4.9785e-07
chr2:638107:G:A	chr2	638107	rs4854343	TMEM-18*	A	G	G	-0.0742269	0.0136663	5.66213e-08
chr2:638144:G:T	chr2	638144	rs4854344	TMEM-18*	T	G	G	-0.0740635	0.0136049	5.27889e-08
chr2:638190:A:G	chr2	638190	rs4854345	TMEM-18*	G	A	A	-0.0751489	0.0137149	4.32459e-08
chr2:638560:T:C	chr2	638560	rs7561556	TMEM-18*	C	T	T	-0.0726898	0.0141857	3.01916e-07
chr2:638566:C:G	chr2	638566	rs386642151/rs7606023	TMEM-18*	G	C	C	-0.0733548	0.0141618	2.24524e-07
chr2:638918:A:C	chr2	638918	rs4854346	TMEM-18*	C	A	A	-0.0717158	0.0135739	1.28222e-07
chr2:639055:T:C	chr2	639055	rs7564708	TMEM-18*	C	T	T	-0.080319	0.0137685	5.51406e-09
chr2:639060:T:A	chr2	639060	rs62105327	TMEM-18*	A	T	T	-0.0785747	0.0136014	7.7225e-09
chr2:639061:T:G	chr2	639061	rs71415995/rs33997909/rs7564711	TMEM-18*	G	T	T	-0.0787511	0.0136103	7.31282e-09
chr2:639900:C:T	chr2	639900	rs11127487	TMEM-18*	T	C	C	-0.0742441	0.0133865	2.95692e-08
chr2:640701:A:G	chr2	640701	rs10166979/rs1265589360	TMEM-18*	G	A	A	-0.0719587	0.013412	8.17583e-08
chr2:640986:CACAT:C	chr2	640986	rs36174930	TMEM-18*	C	CACAT	CACAT	-0.0738896	0.0133065	2.84609e-08
chr2:641082:A:T	chr2	641082	rs10169736	TMEM-18*	T	A	A	-0.0716881	0.0134145	9.19005e-08
chr2:641159:A:C	chr2	641159	rs4854347	TMEM-18*	C	A	A	-0.0752817	0.0134167	2.03857e-08
chr2:641718:T:G	chr2	641718	rs10865550	TMEM-18*	G	T	T	-0.0720189	0.0134059	7.86751e-08
chr2:641863:T:A	chr2	641863	rs10865551	TMEM-18*	A	T	T	-0.0755505	0.0135241	2.35008e-08
chr2:642253:T:C	chr2	642253	rs12714413	TMEM-18*	C	T	T	-0.0712328	0.0133985	1.06948e-07
chr2:642467:A:G	chr2	642467	rs13391851	TMEM-18*	G	A	A	-0.0742533	0.0134428	3.36229e-08
chr2:642499:C:G	chr2	642499	rs7601028	TMEM-18*	G	C	C	-0.0725943	0.0134499	6.84043e-08
chr2:642846:G:A	chr2	642846	rs7591067	TMEM-18*	A	G	G	-0.0745583	0.013387	2.589e-08
chr2:643303:C:G	chr2	643303	rs7604609	TMEM-18*	G	C	C	-0.0753102	0.0134148	2.004e-08
chr2:643315:T:C	chr2	643315	rs7560127	TMEM-18*	C	T	T	-0.0754395	0.0134454	2.04121e-08
chr2:643320:G:A	chr2	643320	rs7594220	TMEM-18*	A	G	G	-0.0758914	0.013449	1.69539e-08
chr2:643428:C:A	chr2	643428	rs7604752	TMEM-18*	A	C	C	-0.0731655	0.0134812	5.79228e-08
chr2:643469:T:C	chr2	643469	rs7560246	TMEM-18*	C	T	T	-0.0736195	0.0135968	6.22057e-08
chr2:644529:T:C	chr2	644529	rs13025697	TMEM-18*	C	T	T	-0.0825669	0.0141648	5.67221e-09
chr2:644953:A:G	chr2	644953	rs7561317	TMEM-18*	G	A	A	-0.0685707	0.0136924	5.5525e-07
chr2:645122:C:G	chr2	645122	rs7558910	TMEM-18*	G	C	C	-0.0869378	0.0159295	4.90527e-08
chr2:645372:T:G	chr2	645372	rs7567710	TMEM-18*	G	T	T	-0.074085	0.0134867	3.99652e-08
chr2:645646:C:T	chr2	645646	rs7559447	TMEM-18*	T	C	C	-0.0735309	0.0133643	3.80077e-08
chr2:646061:T:C	chr2	646061	rs11127488	TMEM-18*	C	T	T	-0.0751655	0.013566	3.05171e-08
chr2:646081:C:T	chr2	646081	rs11127489	TMEM-18*	T	C	C	-0.0689667	0.0138913	6.93991e-07
chr2:646110:C:T	chr2	646110	rs11127490	TMEM-18*	T	C	C	-0.0788577	0.0145493	6.03708e-08
chr2:646345:G:A	chr2	646345	rs10172769	TMEM-18*	A	G	G	-0.0773186	0.0152359	3.92784e-07
chr2:646364:T:A	chr2	646364	rs10189761	TMEM-18*	A	T	T	-0.0760335	0.01501	4.12118e-07
chr2:646674:T:C	chr2	646674	rs10190052	TMEM-18*	C	T	T	-0.0713776	0.0135135	1.29244e-07
chr2:646690:A:AC	chr2	646690	rs1314804337	TMEM-18*	AC	A	A	-0.0661999	0.0139495	2.09478e-06
chr2:646941:T:TG	chr2	646941	rs35362504	TMEM-18*	TG	T	T	-0.0763293	0.0137264	2.72195e-08
chr2:647760:A:G	chr2	647760	rs4854348	TMEM-18*	G	A	A	-0.0789967	0.0139949	1.6794e-08
chr2:647861:T:C	chr2	647861	rs4854349	TMEM-18*	C	T	T	-0.0722868	0.0136343	1.15926e-07
chr2:648198:C:T	chr2	648198	rs7570198	TMEM-18*	T	C	C	-0.0746158	0.0133602	2.36889e-08
chr2:648810:A:G	chr2	648810	rs4452188	TMEM-18*	A	G	G	-0.0892323	0.0165569	7.1924e-08
chr2:649347:T:G	chr2	649347	rs1320338	TMEM-18*	T	G	G	-0.0705158	0.0135828	2.10673e-07
chr2:649638:C:T	chr2	649638	rs2903489	TMEM-18*	C	T	T	-0.0735287	0.0133882	4.02178e-08
chr2:649867:A:T	chr2	649867	rs1320337	TMEM-18*	A	T	T	-0.0732122	0.0135065	6.0131e-08
chr2:650012:G:A	chr2	650012	rs1320336	TMEM-18*	G	A	A	-0.0735254	0.0135259	5.51866e-08
chr2:650143:T:C	chr2	650143	rs2867108	TMEM-18*	T	C	C	-0.0739736	0.0134956	4.27396e-08
chr2:650479:G:C	chr2	650479	rs13386517	TMEM-18*	G	C	C	-0.0709381	0.0134248	1.27679e-07
chr2:650519:A:G	chr2	650519	rs13401686	TMEM-18*	A	G	G	-0.0712722	0.0134079	1.07416e-07
chr2:650560:G:C	chr2	650560	rs13386627	TMEM-18*	G	C	C	-0.0737226	0.0134042	3.84586e-08
chr2:650647:A:G	chr2	650647	rs4613321	TMEM-18*	A	G	G	-0.0735954	0.0134261	4.26937e-08
chr2:650828:G:A	chr2	650828	rs13386964	TMEM-18*	G	A	A	-0.0730047	0.0134339	5.56556e-08
chr2:650973:T:C	chr2	650973	rs13405307/rs879904232	TMEM-18*	T	C	C	-0.0725914	0.0133984	6.10067e-08
chr2:650974:G:T	chr2	650974	rs1553337085/rs386642154/rs13387090	TMEM-18*	G	T	T	-0.0728215	0.0133866	5.39488e-08
chr2:650980:G:A	chr2	650980	rs71415996/rs13387091	TMEM-18*	G	A	A	-0.0744113	0.0135104	3.68103e-08
chr2:651030:T:G	chr2	651030	rs2867109	TMEM-18*	T	G	G	-0.0724253	0.013482	7.87683e-08
chr2:651105:G:C	chr2	651105	rs2867110	TMEM-18*	G	C	C	-0.0727155	0.0134238	6.13486e-08
chr2:651286:A:C	chr2	651286	rs2867111	TMEM-18*	A	C	C	-0.0774546	0.0135793	1.18844e-08
chr2:651290:A:G	chr2	651290	rs2903490	TMEM-18*	A	G	G	-0.077112	0.0135789	1.37609e-08
chr2:651349:T:G	chr2	651349	rs2867112	TMEM-18*	T	G	G	-0.0783168	0.013767	1.29891e-08
chr2:651365:G:A	chr2	651365	rs2867113	TMEM-18*	G	A	A	-0.07688	0.0138807	3.08998e-08
chr2:651380:C:T	chr2	651380	rs2867114	TMEM-18*	C	T	T	-0.0771031	0.0135252	1.21084e-08
chr2:651382:T:C	chr2	651382	rs386642155/rs2867115	TMEM-18*	T	C	C	-0.0752773	0.0135388	2.73192e-08
chr2:652247:G:A	chr2	652247	rs7608050	TMEM-18*	G	A	A	-0.0708777	0.0134479	1.37473e-07
chr2:652272:G:A	chr2	652272	rs6760274	TMEM-18*	G	A	A	-0.0706939	0.0134681	1.54546e-07
chr2:652542:T:C	chr2	652542	rs7574359	TMEM-18*	T	C	C	-0.0734608	0.0134072	4.32524e-08
chr2:652565:A:G	chr2	652565	rs7570993	TMEM-18*	A	G	G	-0.0718214	0.0134083	8.5828e-08
chr2:652607:T:C	chr2	652607	rs10192350	TMEM-18*	T	C	C	-0.0727066	0.0134103	5.97386e-08
chr2:653195:G:A	chr2	653195	rs13396935	TMEM-18*	G	A	A	-0.0859035	0.0159407	7.20205e-08
chr2:653245:A:C	chr2	653245	rs13412194	TMEM-18*	A	C	C	-0.0966554	0.0162211	2.60751e-09
chr2:653250:A:G	chr2	653250	rs13412197	TMEM-18*	A	G	G	-0.0926229	0.0161739	1.04616e-08
chr2:653354:G:A	chr2	653354	rs13397165	TMEM-18*	G	A	A	-0.0724143	0.0135713	9.61734e-08
chr2:653874:C:T	chr2	653874	rs10188334	TMEM-18*	C	T	T	-0.0724272	0.0141022	2.83709e-07
chr2:24852005:T:C	chr2	24852005	rs6545758	ADCY3	T	C	C	0.0537595	0.0113081	2.0091e-06
chr2:24853535:C:T	chr2	24853535	rs61117682	ADCY3	C	T	T	0.0552198	0.0109705	4.86136e-07
chr2:24855122:T:C	chr2	24855122	rs6760328	ADCY3	T	C	C	0.0549041	0.0112387	1.04155e-06
chr2:24859545:G:A	chr2	24859545	rs1541984	ADCY3	G	A	A	0.0581814	0.0107342	6.03112e-08
chr2:24860441:T:C	chr2	24860441	rs7576788	ADCY3	T	C	C	0.0539638	0.0104249	2.28635e-07
chr2:24862545:C:CAA	chr2	24862545	rs1226976342	ADCY3	C	CAA	CAA	0.0525191	0.0106004	7.31282e-07
chr2:24863989:T:C	chr2	24863989	rs1968482	ADCY3	T	C	C	0.0515571	0.0106642	1.34456e-06
chr2:24864774:C:T	chr2	24864774	rs13428789	ADCY3	C	T	T	0.0546576	0.010613	2.62938e-07
chr2:24866297:C:T	chr2	24866297	rs7597157	ADCY3	C	T	T	0.0512937	0.0106526	1.48187e-06
chr2:24867367:T:C	chr2	24867367	rs10184813	ADCY3	T	C	C	0.0520141	0.0106778	1.11774e-06
chr2:24868852:T:TA	chr2	24868852	rs1430993219	ADCY3	T	TA	TA	0.0602974	0.0106502	1.52236e-08
chr2:24869235:A:G	chr2	24869235	rs11685125	ADCY3	A	G	G	0.0514562	0.01066	1.39625e-06
chr2:24869780:G:A	chr2	24869780	rs2384056	ADCY3	G	A	A	0.0514207	0.0106605	1.42137e-06
chr2:24870321:CAAA:C	chr2	24870321	rs1558478424/rs1429695382/rs972478000	ADCY3	CAAA	C	C	0.0527219	0.0106278	7.07946e-07
chr2:24874775:A:G	chr2	24874775	rs13407913/rs1393672719	ADCY3	A	G	G	0.0606258	0.0100995	1.97301e-09
chr2:24880156:G:A	chr2	24880156	rs13387053	ADCY3	G	A	A	0.0599264	0.0121636	8.45068e-07
chr2:24881810:AGT:A	chr2	24881810	rs10616365	ADCY3	AGT	A	A	0.0544045	0.010095	7.1585e-08
chr2:24883396:C:T	chr2	24883396	rs12986610	ADCY3	C	T	T	0.0512715	0.0106594	1.52054e-06
chr2:24884339:G:A	chr2	24884339	rs11675013	ADCY3	G	A	A	0.0510397	0.0106668	1.72312e-06
chr2:24885376:C:G	chr2	24885376	rs1865688	ADCY3	C	G	G	0.0505576	0.010666	2.15164e-06
chr2:24885781:C:A	chr2	24885781	rs10195271	ADCY3	C	A	A	0.0522839	0.0106802	9.88911e-07
chr2:24887215:C:T	chr2	24887215	rs9631062	ADCY3	C	T	T	0.0520473	0.010673	1.08825e-06
chr2:24888865:C:T	chr2	24888865	rs10205326	ADCY3	C	T	T	0.0536462	0.0107797	6.52775e-07
chr2:24894097:T:C	chr2	24894097	rs7603153	ADCY3	T	C	C	0.0500608	0.0104374	1.62794e-06
chr2:24894108:C:T	chr2	24894108	rs7586879	ADCY3	C	T	T	0.050742	0.0104245	1.13853e-06
chr2:24894803:C:T	chr2	24894803	rs10207698	ADCY3	C	T	T	0.0529954	0.0104578	4.06569e-07
chr2:24897864:T:A	chr2	24897864	rs11683429	ADCY3	T	A	A	0.0519657	0.0106544	1.08348e-06
chr2:24898984:G:A	chr2	24898984	rs12713419	ADCY3	G	A	A	0.0518146	0.0105352	8.80432e-07
chr2:24899377:C:T	chr2	24899377	rs13012304	ADCY3	C	T	T	0.0508015	0.0106695	1.93653e-06
chr2:24899454:A:C	chr2	24899454	rs1553363727/rs6718510	ADCY3	A	C	C	0.0576692	0.0100212	8.80691e-09
chr2:24899455:A:G	chr2	24899455	rs374521942/rs879694611/rs6718511	ADCY3	A	G	G	0.0571675	0.0100233	1.19088e-08
chr2:24899929:G:C	chr2	24899929	rs4077677	ADCY3	G	C	C	0.0507249	0.0106642	1.98328e-06
chr2:24900796:G:A	chr2	24900796	rs1077641	ADCY3	G	A	A	0.051206	0.0106804	1.64392e-06
chr2:24901489:C:T	chr2	24901489	rs6545807	ADCY3	C	T	T	0.0530767	0.0104686	4.01284e-07
chr2:24903747:A:G	chr2	24903747	rs13404163	ADCY3	A	G	G	0.0510497	0.0106806	1.76881e-06
chr2:24904137:CAGAG:C	chr2	24904137	rs1440544896/rs10566562	ADCY3	CAGAG	C	C	0.0563601	0.0100671	2.19184e-08
chr2:24904932:C:T	chr2	24904932	rs36029941	ADCY3	C	T	T	0.0516017	0.0106604	1.30492e-06
chr2:24904966:C:T	chr2	24904966	rs17046737	ADCY3	C	T	T	0.0515257	0.0106678	1.37555e-06
chr2:24907223:C:T	chr2	24907223	rs7565468	ADCY3	C	T	T	0.0524071	0.0106979	9.71852e-07
chr2:24907565:C:T	chr2	24907565	rs11683748	ADCY3	C	T	T	0.0527399	0.0107658	9.72077e-07
chr2:24908447:A:G	chr2	24908447	rs6545814	ADCY3	A	G	G	0.0566012	0.010505	7.21335e-08
chr2:24908867:G:A	chr2	24908867	rs13382979	ADCY3	G	A	A	0.0507744	0.0107102	2.14465e-06
chr2:24909079:T:C	chr2	24909079	rs67221599	ADCY3	T	C	C	0.0516715	0.0106579	1.25559e-06
chr2:24910661:CTT:C	chr2	24910661	rs965388475	ADCY3	CTT	C	C	0.054339	0.0101707	9.26139e-08
chr2:24927247:C:A	chr2	24927247	rs6752378	NA	C	A	A	0.0555052	0.0100739	3.63845e-08
chr2:24927427:A:G	chr2	24927427	rs10182181	NA	A	G	G	0.0566453	0.00994678	1.25249e-08
chr2:24935139:T:C	chr2	24935139	rs713586	NA	T	C	C	0.0541601	0.00991213	4.71058e-08
chr2:24935412:C:T	chr2	24935412	rs713587	NA	C	T	T	0.0501514	0.0103001	1.13084e-06
chr2:24936986:T:C	chr2	24936986	rs10865321	NA	T	C	C	0.0562545	0.0102137	3.68208e-08
chr2:24936989:A:G	chr2	24936989	rs1360518893/rs10865322	NA	A	G	G	0.0564172	0.0102093	3.31831e-08
chr2:24964730:C:T	chr2	24964730	rs4665736	DNAJC27	T	C	C	0.0485173	0.0100928	1.54266e-06
chr2:25039757:ATTTTTTTTT:A	chr2	25039757	rs1220663302	NA	A	ATTTTTTTTT	ATTTTTTTTT	0.0493188	0.0103183	1.76859e-06
chr2:63397666:T:A	chr2	63397666	rs7601224	WDPCP	T	A	A	-0.0500617	0.0104269	1.58948e-06
chr4:45024167:ATATC:A	chr4	45024167	rs572374313	NA	ATATC	A	A	0.534373	0.108083	7.71243e-07
chr8:6592851:A:T	chr8	6592851	rs118052007	MCPH1	A	T	T	-0.208316	0.0426128	1.02408e-06
chr8:75661088:AC:A	chr8	75661088	rs776754619	NA	A	AC	AC	-0.0539768	0.0114046	2.22939e-06
chr8:107837191:GA:G	chr8	107837191	rs201635894	NA	GA	G	G	0.728827	0.144101	4.28298e-07
chr11:27645655:T:G	chr11	27645655	rs925946	BDNF-AS	G	T	T	0.0575447	0.0114839	5.46959e-07
chr11:27654165:C:T	chr11	27654165	rs1519480	BDNF-AS	T	C	C	0.0569719	0.0110816	2.75807e-07
chr11:27655494:C:T	chr11	27655494	rs7124442	BDNF-AS_BDNF	T	C	C	0.0550156	0.0113308	1.21154e-06
chr13:57742478:T:C	chr13	57742478	rs9569733	PDCH17*	T	C	C	-0.0704005	0.0146773	1.62644e-06
chr13:57745342:A:G	chr13	57745342	rs9569734	PDCH17*	A	G	G	-0.0699473	0.0145995	1.67143e-06
chr13:57765683:C:A	chr13	57765683	rs9563533	PDCH17*	C	A	A	-0.0553337	0.0113799	1.16884e-06
chr13:57772970:CAA:C	chr13	57772970	rs1372401913/rs79553587	PDCH17*	CAA	C	C	-0.054694	0.0113773	1.54132e-06
chr13:57808386:T:A	chr13	57808386	rs2077705	PDCH17*	T	A	A	-0.055533	0.0116119	1.74471e-06
chr13:57822550:CA:C	chr13	57822550	rs1029973186	PDCH17*	CA	C	C	-0.0749656	0.0151312	7.31809e-07
chr13:57825101:C:T	chr13	57825101	rs9591839	PDCH17*	C	T	T	-0.0557848	0.0116567	1.71714e-06
chr13:57842629:C:T	chr13	57842629	rs9563542	PDCH17*	C	T	T	-0.0739866	0.0151668	1.07911e-06
chr13:57849954:A:T	chr13	57849954	rs9563546	PDCH17*	A	T	T	-0.0552551	0.0116115	1.96282e-06
chr13:57850190:A:C	chr13	57850190	rs9591842	PDCH17*	A	C	C	-0.0553381	0.0116233	1.94066e-06
chr13:57856503:T:C	chr13	57856503	rs7331969	PDCH17*	T	C	C	-0.0557705	0.0115958	1.52401e-06
chr13:57870692:G:A	chr13	57870692	rs9563551	PDCH17*	G	A	A	-0.0743583	0.0151468	9.22038e-07
chr13:57887630:G:T	chr13	57887630	rs4886037	PDCH17*	G	T	T	-0.0754143	0.0155336	1.21382e-06
chr13:57977707:A:T	chr13	57977707	rs9569790	PDCH17*	A	T	T	-0.0639813	0.0134312	1.91497e-06
chr13:57978441:A:G	chr13	57978441	rs1555260128/rs386771284/rs4886049	PDCH17*	A	G	G	-0.0631478	0.0133552	2.27949e-06
chr13:57981316:T:C	chr13	57981316	rs68160525	PDCH17*	T	C	C	-0.0632442	0.0133654	2.23924e-06
chr13:57984473:C:T	chr13	57984473	rs12875541	PDCH17*	C	T	T	-0.0636082	0.0134425	2.24025e-06
chr13:57985396:T:C	chr13	57985396	rs9569795	LINC02338*	T	C	C	-0.0786125	0.0164742	1.83901e-06
chr13:57990679:G:A	chr13	57990679	rs9563567	LINC02338*	G	A	A	-0.0636457	0.0133735	1.95852e-06
chr13:58008377:G:T	chr13	58008377	rs12585496	LINC02338*	G	T	T	-0.0633457	0.0134037	2.3058e-06
chr13:58008381:A:G	chr13	58008381	rs12583893	LINC02338*	A	G	G	-0.063614	0.0134048	2.09314e-06
chr13:58044718:G:T	chr13	58044718	rs9569807	LINC02338*	G	T	T	-0.0639794	0.0133869	1.77222e-06
chr13:58049468:G:A	chr13	58049468	rs7988221	LINC02338*	G	A	A	-0.0634385	0.0134151	2.27306e-06
chr13:58049649:A:T	chr13	58049649	rs12866691	LINC02338*	A	T	T	-0.058234	0.0120978	1.49321e-06
chr13:58050668:C:T	chr13	58050668	rs12872173	LINC02338*	C	T	T	-0.0587974	0.0120917	1.16737e-06
chr13:58051712:G:A	chr13	58051712	rs61957689	LINC02338*	G	A	A	-0.0595754	0.0121165	8.86417e-07
chr13:58052054:G:A	chr13	58052054	rs11148421	LINC02338*	G	A	A	-0.0582658	0.0120654	1.38144e-06
chr13:58052056:G:A	chr13	58052056	rs386771286/rs11148422	LINC02338*	G	A	A	-0.0580723	0.0120648	1.49496e-06
chr13:58052335:A:G	chr13	58052335	rs11148423	LINC02338*	A	G	G	-0.0585101	0.0121267	1.41136e-06
chr13:58053122:T:C	chr13	58053122	rs2121058	LINC02338*	T	C	C	-0.0579446	0.0121572	1.89003e-06
chr13:58054502:T:C	chr13	58054502	rs8000972	LINC02338*	T	C	C	-0.0572763	0.0120978	2.21192e-06
chr13:58056517:G:T	chr13	58056517	rs12431244	LINC02338*	G	T	T	-0.0587383	0.0121322	1.29826e-06
chr13:58057801:T:C	chr13	58057801	rs7998206	LINC02338*	T	C	C	-0.0584542	0.0120788	1.31214e-06
chr13:58089323:G:T	chr13	58089323	rs12583517	LINC02338*	G	T	T	-0.0568345	0.0119975	2.1819e-06
chr13:58092895:A:C	chr13	58092895	rs9569815	LINC02338*	A	C	C	-0.057233	0.0119674	1.74463e-06
chr13:58097243:A:G	chr13	58097243	rs12585686	LINC02338*	A	G	G	-0.0569857	0.0119857	2.00381e-06
chr13:58108334:A:C	chr13	58108334	rs7989885	LINC02338*	A	C	C	-0.0576492	0.0119363	1.3772e-06
chr13:58222698:A:AT	chr13	58222698	rs66669327	LINC00374	A	AT	AT	-0.0846884	0.0177878	1.94106e-06
chr16:28592014:T:C	chr16	28592014	rs762634	SULT1A2	T	C	C	0.0515328	0.0107405	1.61457e-06
chr16:28592334:T:G	chr16	28592334	rs1059491	SULT1A2	T	G	G	0.0506059	0.0103787	1.09129e-06
chr16:28620039:A:T	chr16	28620039	rs28410083	SULT1A1	T	A	A	0.0533925	0.0104736	3.46843e-07
chr16:28826194:T:C	chr16	28826194	rs386790192/rs8049439	ATXN2L	T	C	C	0.0513595	0.0101999	4.81255e-07
chr16:28833044:G:A	chr16	28833044	rs62036657	ATXN2L	G	A	A	0.0501061	0.0105212	1.92742e-06
chr16:28835519:T:G	chr16	28835519	rs56404918	ATXN2L	T	G	G	0.0498653	0.0105532	2.3162e-06
chr16:28835545:G:A	chr16	28835545	rs55719896	ATXN2L	G	A	A	0.0512276	0.0104371	9.26632e-07
chr16:28844201:G:C	chr16	28844201	rs61737565	TUFM	G	C	C	0.0491517	0.010398	2.29437e-06
chr16:28844406:A:G	chr16	28844406	rs4788099	TUFM	A	G	G	0.049413	0.0102385	1.40205e-06
chr16:28846324:A:G	chr16	28846324	rs7187776	TUFM	A	G	G	0.0640602	0.0116478	3.8647e-08
chr16:28862077:G:A	chr16	28862077	rs4788102	SH2B1	G	A	A	0.0546266	0.0106649	3.05253e-07
chr16:28871920:A:G	chr16	28871920	rs7498665	SH2B1	A	G	G	0.0504663	0.0103081	9.86853e-07
chr16:28878810:C:A	chr16	28878810	rs62037371	ATP2A1	C	A	A	0.0512291	0.0104616	9.8177e-07
chr16:53756087:C:T	chr16	53756087	rs2892469	FTO	C	T	T	0.052267	0.0102086	3.08729e-07
chr16:53756850:C:T	chr16	53756850	rs17217144	FTO	C	T	T	0.0526172	0.0101947	2.478e-07
chr16:53756928:G:A	chr16	53756928	rs1075439	FTO	G	A	A	0.0499632	0.0100067	5.99708e-07
chr16:53757499:G:A	chr16	53757499	rs1077129	FTO	G	A	A	0.0544759	0.0103914	1.60265e-07
chr16:53758527:C:T	chr16	53758527	rs7184874	FTO	C	T	T	0.0564759	0.0105838	9.61648e-08
chr16:53758909:TA:T	chr16	53758909	rs1396366529	FTO	TA	T	T	0.0581124	0.0107884	7.27641e-08
chr16:53764611:G:A	chr16	53764611	rs8047395	FTO	A	G	G	-0.0599278	0.0104865	1.1161e-08
chr16:53765357:GACC:G	chr16	53765357	rs980537516	FTO	GACC	G	G	0.0879673	0.0103451	1.99026e-17
chr16:53765366:G:GT	chr16	53765366	rs572635656/rs199952722	FTO	G	GT	GT	0.0923004	0.0106071	3.53775e-18
chr16:53765367:G:T	chr16	53765367	rs752511215/rs369160745/rs57292959/rs143429070	FTO	G	T	T	0.0938984	0.010608	9.38919e-19
chr16:53765595:G:A	chr16	53765595	rs9937053	FTO	G	A	A	0.0787642	0.0128018	7.8497e-10
chr16:53765935:G:A	chr16	53765935	rs9937354	FTO	G	A	A	0.0887295	0.01123	2.94379e-15
chr16:53765993:A:G	chr16	53765993	rs9928094	FTO	A	G	G	0.0859654	0.0100849	1.6483e-17
chr16:53766065:T:G	chr16	53766065	rs9930333	FTO	T	G	G	0.0851278	0.0100582	2.77213e-17
chr16:53766073:T:A	chr16	53766073	rs9930397	FTO	T	A	A	0.0850763	0.0100594	2.91966e-17
chr16:53766656:G:A	chr16	53766656	rs9939973	FTO	G	A	A	0.08531	0.0100478	2.2008e-17
chr16:53766717:C:G	chr16	53766717	rs9940646	FTO	C	G	G	0.0848133	0.010043	3.24575e-17
chr16:53766842:G:A	chr16	53766842	rs9940128	FTO	G	A	A	0.0851087	0.010042	2.50496e-17
chr16:53767042:T:C	chr16	53767042	rs1421085	FTO	T	C	C	0.0942868	0.0100997	1.10602e-20
chr16:53767431:C:A	chr16	53767431	rs1421086	FTO	C	A	A	0.0870891	0.0102558	2.18896e-17
chr16:53767637:C:T	chr16	53767637	rs9923147	FTO	C	T	T	0.0853548	0.01009	2.87484e-17
chr16:53768073:C:T	chr16	53768073	rs9923544	FTO	C	T	T	0.085468	0.0100932	2.67458e-17
chr16:53768582:C:T	chr16	53768582	rs11642015	FTO	C	T	T	0.0922677	0.0102731	2.9102e-19
chr16:53769275:A:T	chr16	53769275	rs1558901	FTO	A	T	T	0.0861753	0.0103264	7.59304e-17
chr16:53769311:G:A	chr16	53769311	rs62048402	FTO	G	A	A	0.0937475	0.0102555	6.76645e-20
chr16:53769662:T:A	chr16	53769662	rs1558902	FTO	T	A	A	0.0928488	0.0102542	1.49538e-19
chr16:53770428:C:T	chr16	53770428	rs1861866	FTO	T	C	C	-0.0669174	0.00996683	1.94544e-11
chr16:53771053:T:C	chr16	53771053	rs10852521	FTO	C	T	T	-0.0669395	0.0100528	2.8345e-11
chr16:53773852:A:G	chr16	53773852	rs17817288	FTO	A	G	G	0.0748664	0.00995255	5.61936e-14
chr16:53775335:G:A	chr16	53775335	rs1121980	FTO	G	A	A	0.0844428	0.0100749	5.57032e-17
chr16:53776774:T:C	chr16	53776774	rs7193144	FTO	T	C	C	0.0933183	0.0108462	8.3565e-18
chr16:53777876:A:G	chr16	53777876	rs62033400	FTO	A	G	G	0.0931813	0.0102455	1.03568e-19
chr16:53778521:T:C	chr16	53778521	rs8063057	FTO	T	C	C	0.0990123	0.0192462	2.78156e-07
chr16:53778702:G:A	chr16	53778702	rs8057044	FTO	G	A	A	0.0700726	0.00999795	2.48273e-12
chr16:53779455:T:G	chr16	53779455	rs17817449	FTO	T	G	G	0.0954179	0.0105348	1.46488e-19
chr16:53779538:A:T	chr16	53779538	rs8043757	FTO	A	T	T	0.092813	0.0102971	2.17667e-19
chr16:53781249:T:G	chr16	53781249	rs11075987	FTO	G	T	T	-0.0643357	0.00994129	9.92949e-11
chr16:53782363:C:A	chr16	53782363	rs8050136	FTO	C	A	A	0.0912583	0.0102505	5.90614e-19
chr16:53782840:A:G	chr16	53782840	rs8051591	FTO	A	G	G	0.0911945	0.0140067	7.81098e-11
chr16:53782926:G:A	chr16	53782926	rs9935401	FTO	G	A	A	0.0892767	0.010242	3.08667e-18
chr16:53784548:G:T	chr16	53784548	rs3751812	FTO	G	T	T	0.0942173	0.0103096	6.92163e-20
chr16:53784901:A:G	chr16	53784901	rs927213157/rs9931900	FTO	A	G	G	0.0848003	0.0105642	1.06098e-15
chr16:53784922:A:G	chr16	53784922	rs386790836/rs56313538	FTO	A	G	G	0.0930442	0.0106473	2.56806e-18
chr16:53785257:T:C	chr16	53785257	rs9936385	FTO	T	C	C	0.0921085	0.0103282	5.15225e-19
chr16:53785286:G:C	chr16	53785286	rs9923233	FTO	G	C	C	0.0923888	0.0103411	4.4629e-19
chr16:53785965:C:T	chr16	53785965	rs11075989	FTO	C	T	T	0.0953218	0.0127548	8.32411e-14
chr16:53785981:A:G	chr16	53785981	rs11075990	FTO	A	G	G	0.08891	0.0126886	2.5535e-12
chr16:53786025:A:T	chr16	53786025	rs11075991	FTO	A	T	T	0.09151	0.0126374	4.69829e-13
chr16:53786591:G:A	chr16	53786591	rs9926289	FTO	G	A	A	0.0904201	0.010155	5.83621e-19
chr16:53786615:T:A	chr16	53786615	rs9939609	FTO	T	A	A	0.0908543	0.0101508	3.84424e-19
chr16:53787084:C:G	chr16	53787084	rs9927317	FTO	C	G	G	0.0930817	0.0101813	6.69435e-20
chr16:53787385:T:C	chr16	53787385	rs7206410	FTO	T	C	C	0.0954016	0.0102513	1.46373e-20
chr16:53787703:A:G	chr16	53787703	rs7202116	FTO	A	G	G	0.0909714	0.0106286	1.2248e-17
chr16:53787778:A:G	chr16	53787778	rs7202296	FTO	A	G	G	0.0811996	0.0146691	3.18678e-08
chr16:53788230:C:A	chr16	53788230	rs66908032	FTO	C	A	A	0.0915848	0.0101769	2.47587e-19
chr16:53788257:AT:A	chr16	53788257	rs113935429	FTO	AT	A	A	0.0787801	0.0109825	7.61002e-13
chr16:53788271:C:T	chr16	53788271	rs72803697	FTO	C	T	T	0.0909564	0.0101775	4.34881e-19
chr16:53788325:A:G	chr16	53788325	rs1243617223/rs62033403	FTO	A	G	G	0.0890444	0.0102523	4.06754e-18
chr16:53788327:A:G	chr16	53788327	rs386790837/rs62033404/rs1567986734	FTO	A	G	G	0.0889945	0.0102519	4.23096e-18
chr16:53788590:T:G	chr16	53788590	rs7190396	FTO	T	G	G	0.090374	0.0171969	1.52194e-07
chr16:53788602:CAAA:C	chr16	53788602	rs1285330517/rs1314103653	FTO	CAAA	C	C	0.0914623	0.0109412	6.75476e-17
chr16:53788739:A:G	chr16	53788739	rs1417860482/rs7185735	FTO	A	G	G	0.0867392	0.0112074	1.05574e-14
chr16:53789806:G:A	chr16	53789806	rs2042031	FTO	A	G	G	-0.0621812	0.0103365	1.82259e-09
chr16:53789815:T:C	chr16	53789815	rs79994966	FTO	T	C	C	0.0931356	0.0101592	5.29545e-20
chr16:53789966:T:C	chr16	53789966	rs28432761	FTO	C	T	T	-0.0829356	0.00999221	1.10736e-16
chr16:53790078:C:T	chr16	53790078	rs11647020	FTO	T	C	C	-0.0818422	0.00997965	2.53036e-16
chr16:53790095:G:A	chr16	53790095	rs11646715	FTO	A	G	G	-0.0818391	0.00997924	2.53013e-16
chr16:53791576:C:T	chr16	53791576	rs9941349	FTO	C	T	T	0.0870433	0.0108154	8.94569e-16
chr16:53791993:G:A	chr16	53791993	rs56137030	FTO	G	A	A	0.0924209	0.0101744	1.14679e-19
chr16:53792116:T:C	chr16	53792116	rs28567725	FTO	T	C	C	0.0842632	0.0100903	7.21475e-17
chr16:53793267:C:G	chr16	53793267	rs9931494	FTO	C	G	G	0.0842099	0.010087	7.37161e-17
chr16:53794154:C:T	chr16	53794154	rs17817964	FTO	C	T	T	0.0939577	0.0103248	9.87234e-20
chr16:53794840:A:G	chr16	53794840	rs7190492	FTO	G	A	A	-0.0612513	0.010327	3.05791e-09
chr16:53796540:A:G	chr16	53796540	rs9930501	FTO	A	G	G	0.0829432	0.0120238	5.4721e-12
chr16:53796553:A:G	chr16	53796553	rs9930506	FTO	A	G	G	0.0857925	0.0112735	2.88268e-14
chr16:53796579:T:C	chr16	53796579	rs9932754	FTO	T	C	C	0.0892624	0.0115095	9.31788e-15
chr16:53796955:T:A	chr16	53796955	rs9933040	FTO	T	A	A	0.0794387	0.0100049	2.13032e-15
chr16:53797234:C:T	chr16	53797234	rs9922708	FTO	C	T	T	0.0790671	0.00999541	2.70214e-15
chr16:53800695:T:C	chr16	53800695	rs7188250	FTO	T	C	C	0.0873207	0.010072	4.66197e-18
chr16:53800696:G:A	chr16	53800696	rs1555635714/rs386790838/rs1555635717/rs72805612	FTO	G	A	A	0.0873602	0.010068	4.36969e-18
chr16:53805223:T:C	chr16	53805223	rs8044769	FTO	C	T	T	-0.0612974	0.0101094	1.35761e-09
chr16:53808996:G:A	chr16	53808996	rs12149832	FTO	G	A	A	0.0921853	0.0104651	1.37466e-18
chr16:53811575:C:A	chr16	53811575	rs11642841	FTO	C	A	A	0.0875651	0.0102355	1.26343e-17
chr16:69911189:C:T	chr16	69911189	rs4985451	WWP2	T	C	C	-0.0513705	0.0107501	1.77824e-06
chr16:69911238:C:T	chr16	69911238	rs4985452	WWP2	T	C	C	-0.0513835	0.0107424	1.73784e-06
chr16:69911629:G:A	chr16	69911629	rs2362643	WWP2	A	G	G	-0.0525847	0.0107679	1.05085e-06
chr16:69922057:C:G	chr16	69922057	rs9746247	WWP2	G	C	C	-0.0525233	0.0103104	3.53542e-07
chr18:60159337:T:C	chr18	60159337	rs12967878	MC4R*	T	C	C	0.0568654	0.0119581	1.99496e-06
chr18:60161902:T:C	chr18	60161902	rs6567160	MC4R*	T	C	C	0.0600954	0.0120018	5.57177e-07
chr18:60171168:G:A	chr18	60171168	rs663129	MC4R*	G	A	A	0.0611162	0.0124755	9.7223e-07
chr18:60172536:C:A	chr18	60172536	rs571312	MC4R*	C	A	A	0.0584887	0.0123671	2.26873e-06
chr18:60181136:A:T	chr18	60181136	rs523288	MC4R*	A	T	T	0.0568744	0.0117621	1.33867e-06
chr18:60183864:T:C	chr18	60183864	rs17782313	MC4R*	T	C	C	0.0576434	0.0117739	9.86378e-07
chr18:60185354:T:C	chr18	60185354	rs476828	MC4R*	T	C	C	0.0595893	0.0119267	5.89504e-07
chr18:60185715:A:C	chr18	60185715	rs11152213	MC4R*	A	C	C	0.060555	0.0123803	1.0108e-06
chr18:60186055:TAGAG:T	chr18	60186055	rs35361355	MC4R*	TAGAG	T	T	0.0564186	0.0118392	1.89847e-06
chr19:36128105:G:A	chr19	36128105	rs57803073	LOC105372385	G	A	A	0.293614	0.0580024	4.18348e-07
chr21:24476768:C:T	chr21	24476768	rs150097123	LINC01684	C	T	T	0.310541	0.0640198	1.24033e-06
**Within 200,000bp of the annotated gene
***Results are based on a significance threshold of FDR = 4.60x10-6
