# Supplementary material for: The Impact of ACEs on BMI: An Investigation of the Genotype-Environment Effects of BMI
Source: Front Genet. 2022 Mar 7;13:816660. doi: 10.3389/fgene.2022.816660 (PMC8942770; doi:10.3389/fgene.2022.816660)
Supplement: Supplementary file 4 [file Table1.XLSX]

## Sheet: tmp
Table S1. Participant transformed and non-transformed BMI
ID	Sex	BMI	BMIT	numACEs	Sex
1	1	26.4465	-0.201265	0	1
2	2	25.015	-0.467006	0	2
3	2	27.6627	0.0195179	8	2
4	2	20.9826	-1.47453	0	2
5	1	32.8577	0.776758	0	1
6	2	31.0567	0.551086	2	2
7	1	22.0357	-1.17625	3	1
8	2	34.2173	0.933747	0	2
9	1	31.1167	0.557237	0	1
10	1	27.914	0.0585836	1	1
11	1	27.8656	0.0507652	0	1
12	2	28.5914	0.187933	0	2
13	1	37.7415	1.32111	0	1
14	1	24.2138	-0.630743	0	1
15	2	23	-0.927241	1	2
16	2	32.93	0.787358	4	2
17	2	19.7445	-1.8943	6	2
18	2	24.0167	-0.686575	2	2
19	2	19.4364	-2.00889	4	2
20	2	25.47	-0.382019	1	2
21	2	37.2717	1.26748	0	2
22	1	38.6055	1.41464	3	1
23	2	28.38	0.154317	0	2
24	2	26.98	-0.0973148	6	2
25	1	23.9013	-0.712173	1	1
26	2	33.83	0.885716	0	2
27	2	27.6169	0.0133983	5	2
28	1	47.1983	2.19894	1	1
29	2	25.0593	-0.456794	1	2
30	2	21.6329	-1.29847	1	2
31	2	27.1621	-0.0695777	3	2
32	1	36.7947	1.21949	1	1
33	2	18.99	-2.1582	0	2
34	1	31.13	0.559703	0	1
35	2	24.26	-0.623808	0	2
36	2	23.522	-0.79428	0	2
37	2	21.69	-1.28318	3	2
38	1	19.549	-1.97366	1	1
39	2	45.9233	2.06604	3	2
40	2	21.5908	-1.31307	0	2
41	1	30.5844	0.48829	0	1
42	2	28.9707	0.24518	1	2
43	1	28.5914	0.187933	2	1
44	1	32.9832	0.791391	0	1
45	1	28.2048	0.115351	3	1
46	2	44.668	1.96631	7	2
47	2	24.22	-0.629071	6	2
48	2	25.7672	-0.323409	3	2
49	1	24.1887	-0.64237	2	1
50	2	24.2023	-0.639261	0	2
51	2	28.8891	0.23519	3	2
52	2	25.4425	-0.386107	3	2
53	2	35.0089	1.02796	0	2
54	2	32.3475	0.71926	4	2
55	1	26.3336	-0.220682	0	1
56	2	32.99	0.792835	5	2
57	1	27.629	0.0142424	0	1
58	1	24.4073	-0.585806	0	1
59	1	34.628	0.983864	3	1
60	2	21.8733	-1.22751	2	2
61	2	21.625	-1.30364	0	2
62	1	24.0091	-0.687376	7	1
63	2	35.2197	1.04967	5	2
64	2	25.37	-0.397841	1	2
65	2	20.9025	-1.50756	2	2
66	1	23.0126	-0.923033	1	1
67	1	27.59	0.0100223	0	1
68	1	27.12	-0.0800511	0	1
69	1	21.63	-1.30167	0	1
70	1	35.4033	1.0622	6	1
71	1	31.005	0.542389	2	1
72	2	26.23	-0.240508	8	2
73	2	19.7481	-1.89177	2	2
74	2	20.2324	-1.70253	7	2
75	2	27.3686	-0.0358762	4	2
76	1	31.9671	0.668262	0	1
77	2	25.4433	-0.385766	0	2
78	2	29.4488	0.321631	1	2
79	1	35.7773	1.10976	1	1
80	1	23.734	-0.746306	0	1
81	2	30.1345	0.423437	8	2
82	2	31.58	0.617413	3	2
83	2	23.3441	-0.83605	2	2
84	1	22.21	-1.1299	2	1
85	2	33.5964	0.860541	0	2
86	1	36.195	1.1575	3	1
87	2	26.6251	-0.156133	3	2
88	2	26.4315	-0.204495	0	2
89	2	22.88	-0.950353	0	2
90	2	20.119	-1.74301	0	2
91	2	20.1753	-1.72079	1	2
92	2	33.1236	0.807364	3	2
93	1	31.74	0.636158	0	1
94	2	20.9823	-1.48177	1	2
95	2	28.8069	0.223277	1	2
96	1	27.7624	0.0356651	0	1
97	2	25.4039	-0.391797	0	2
98	2	37.3109	1.27173	0	2
99	2	33.04	0.797466	0	2
100	2	28.2207	0.120025	4	2
101	1	27.5625	0.00622428	0	1
102	2	29.01	0.250728	0	2
103	2	24.554	-0.558962	2	2
104	2	23.2269	-0.86207	3	2
105	2	25.288	-0.410089	2	2
106	2	26.4425	-0.202557	3	2
107	2	32.6547	0.755536	0	2
108	1	31.325	0.585055	2	1
109	2	25.0775	-0.451298	6	2
110	1	31.3692	0.588313	4	1
111	2	29.2167	0.284187	7	2
112	2	34.0675	0.917234	5	2
113	2	19.7662	-1.87991	5	2
114	2	23.705	-0.754414	5	2
115	1	31.4543	0.599134	2	1
116	1	18.8285	-2.23081	1	1
117	2	39.786	1.52386	7	2
118	2	50.385	2.45099	0	2
119	1	23.9	-0.712581	0	1
120	2	30.9867	0.537507	1	2
121	2	26.15	-0.25356	4	2
122	2	41.9533	1.71894	6	2
123	2	23.0126	-0.923033	0	2
124	2	20.745	-1.55491	0	2
125	1	24.1275	-0.658009	0	1
126	2	23.8876	-0.716121	1	2
127	2	29.966	0.397727	9	2
128	2	24.0307	-0.681376	3	2
129	2	47.2994	2.21093	5	2
130	2	23.1724	-0.87592	2	2
131	2	26.456	-0.198897	3	2
132	2	24.759	-0.516778	1	2
133	1	26.814	-0.121725	1	1
134	2	20.4082	-1.64599	3	2
135	2	34.88	1.01586	6	2
136	2	28.4808	0.169496	0	2
137	2	20.9233	-1.50134	0	2
138	2	37.6193	1.30561	0	2
139	2	25.4603	-0.383268	3	2
140	2	33.8	0.883376	5	2
141	2	16.9735	-2.91505	3	2
142	2	35.504	1.07715	0	2
143	2	21.944	-1.20541	1	2
144	1	28.0578	0.0865087	0	1
145	2	46.3619	2.10309	2	2
146	2	27.5207	0.000527478	6	2
147	2	40.3372	1.5721	3	2
148	2	36.8817	1.22886	5	2
149	1	23.7099	-0.753292	3	1
150	1	31.3243	0.584804	2	1
151	2	28.463	0.166072	2	2
152	2	18.5767	-2.33975	3	2
153	2	27.4111	-0.0290154	0	2
154	1	25.926	-0.287154	0	1
155	2	26.2842	-0.231071	3	2
156	2	21.13	-1.43591	0	2
157	1	26.6375	-0.148128	1	1
158	2	28.7962	0.22079	2	2
159	1	33.2394	0.821475	2	1
160	1	20.92	-1.50264	0	1
161	1	29.6822	0.351552	0	1
162	2	25.6853	-0.341806	1	2
163	2	23.4931	-0.799643	2	2
164	2	30.7853	0.510879	10	2
165	2	27.3888	-0.0323928	0	2
166	2	37.515	1.29237	0	2
167	2	29.3764	0.312091	4	2
168	1	22.6704	-1.00304	1	1
169	2	27.7612	0.0349261	0	2
170	1	24.0963	-0.6651	1	1
171	1	33.4505	0.843705	1	1
172	1	29.697	0.355146	1	1
173	2	23.1075	-0.893394	0	2
174	2	32.4493	0.731474	3	2
175	1	22.8156	-0.966888	3	1
176	1	27.9845	0.0759242	0	1
177	2	27.6933	0.0237387	3	2
178	2	26.7657	-0.130445	0	2
179	2	25.7931	-0.317856	10	2
180	2	18.98	-2.16474	2	2
181	2	45.5875	2.04	1	2
182	2	27.36	-0.0385154	0	2
183	2	26.3956	-0.209453	0	2
184	1	30.9434	0.531301	1	1
185	1	28.6164	0.192445	5	1
186	1	29.837	0.376691	0	1
187	2	35.035	1.02975	2	2
188	1	26.3043	-0.227605	4	1
189	2	36.6095	1.20366	1	2
190	2	24.6282	-0.544957	0	2
191	1	19.7899	-1.86891	2	1
192	1	27.8242	0.0456955	0	1
193	2	47.2076	2.20131	4	2
194	2	22.415	-1.07715	0	2
195	2	22.4349	-1.07189	5	2
196	1	25.29	-0.409286	0	1
197	2	21.2529	-1.40722	0	2
198	1	29.9662	0.397955	1	1
199	1	35.7	1.09677	0	1
200	2	24.6916	-0.533245	6	2
201	1	21.9736	-1.18643	1	1
202	2	25.2918	-0.408712	1	2
203	1	26.7035	-0.138962	1	1
204	1	31.2179	0.57109	0	1
205	2	29.3452	0.306668	0	2
206	2	19.58	-1.95194	0	2
207	1	27.5438	0.00369235	1	1
208	2	34.88	1.01586	0	2
209	1	23.9671	-0.695684	0	1
210	2	25.6061	-0.35582	0	2
211	2	21.0587	-1.45602	0	2
212	2	22.83	-0.962185	0	2
213	2	27.2662	-0.0537231	7	2
214	2	38.2817	1.38376	3	2
215	1	23.0559	-0.906681	2	1
216	2	19.0427	-2.13702	0	2
217	2	32.2805	0.709728	2	2
218	2	26.6054	-0.162436	1	2
219	2	32.1494	0.691658	0	2
220	2	23.0462	-0.908911	1	2
221	1	25.5965	-0.359419	3	1
222	2	22.54	-1.04111	0	2
223	1	32.3569	0.720353	1	1
224	2	26.1703	-0.249313	2	2
225	2	31.15	0.563037	2	2
226	2	35.3871	1.06071	2	2
227	1	30.5665	0.485439	2	1
228	2	21.948	-1.20236	0	2
229	1	26.19	-0.246158	2	1
230	2	16.7859	-3.00792	2	2
231	1	27.6151	0.0127653	0	1
232	1	36.61	1.20541	1	1
233	2	23.5333	-0.792402	1	2
234	2	33.7475	0.876539	2	2
235	2	26.6618	-0.144929	0	2
236	2	37.6258	1.3076	0	2
237	2	26.0905	-0.26294	0	2
238	1	34.3033	0.945228	4	1
239	2	23.13	-0.887278	0	2
240	2	26.8552	-0.116201	2	2
241	2	38.7733	1.42973	5	2
242	2	20.3977	-1.64762	2	2
243	2	28.3572	0.151542	9	2
244	1	29.1589	0.272015	4	1
245	2	25.0807	-0.45013	5	2
246	2	36.5092	1.18856	3	2
247	1	21.1092	-1.44245	0	1
248	2	34.177	0.927565	3	2
249	2	21.037	-1.45784	0	2
250	2	23.7139	-0.751892	0	2
251	2	32.08	0.682574	1	2
252	2	22.9121	-0.945228	2	2
253	2	25.7909	-0.318521	0	2
254	2	22.5207	-1.04529	1	2
255	2	36.95	1.23562	0	2
256	2	27.4636	-0.0112883	0	2
257	2	27.9729	0.0694719	0	2
258	2	26.24	-0.238119	6	2
259	2	31.4207	0.595351	0	2
260	2	20.1176	-1.74833	2	2
261	2	21.2568	-1.40496	1	2
262	1	27.62	0.0138204	4	1
263	2	30.0011	0.4039	8	2
264	1	25.656	-0.346395	1	1
265	2	29.7247	0.359869	4	2
266	2	21.1977	-1.41867	2	2
267	2	23.1824	-0.871593	8	2
268	1	40.1754	1.56023	5	1
269	2	34.9175	1.0194	0	2
270	2	35.3504	1.05923	7	2
271	2	25.6625	-0.345275	0	2
272	2	20.9823	-1.48177	1	2
273	2	30.694	0.502602	1	2
274	2	25.0593	-0.456794	1	2
275	2	23.7919	-0.732716	0	2
276	2	24.12	-0.660107	0	2
277	1	30.8858	0.523299	2	1
278	2	22.26	-1.11859	0	2
279	2	52.4565	2.58631	0	2
280	2	20.1753	-1.72079	0	2
281	2	33.83	0.886184	1	2
282	2	31.0178	0.547039	1	2
283	2	21.948	-1.20236	4	2
284	1	28.8891	0.23519	0	1
285	1	27.2667	-0.0534062	0	1
286	2	32.4493	0.731474	4	2
287	1	33.1448	0.809412	1	1
288	2	23.24	-0.859167	6	2
289	2	25.3819	-0.395901	3	2
290	2	22.785	-0.97704	3	2
291	1	33.8644	0.88994	1	1
292	2	25.6333	-0.348636	0	2
293	1	31.0112	0.545447	1	1
294	2	42.0867	1.73678	1	2
295	2	35.5085	1.08074	0	2
296	1	31.6479	0.624961	0	1
297	2	19.37	-2.03329	5	2
298	1	21.95	-1.19932	1	1
299	2	33.6483	0.866668	0	2
300	1	26.935	-0.105798	6	1
301	2	29.8466	0.37907	4	2
302	2	34.3567	0.956836	0	2
303	2	24.9967	-0.470067	0	2
304	2	29.39	0.314529	0	2
305	1	24.39	-0.592583	2	1
306	1	25.7583	-0.325633	0	1
307	1	31.5033	0.605965	6	1
308	1	25.408	-0.390202	0	1
309	2	24.8	-0.508596	0	2
310	2	26.4222	-0.206219	0	2
311	2	19.8192	-1.85282	0	2
312	2	24.6915	-0.534218	0	2
313	1	27.256	-0.0574211	0	1
314	2	45.3563	2.01851	3	2
315	2	25.1521	-0.431528	5	2
316	1	23.626	-0.772202	0	1
317	2	22.5876	-1.03154	2	2
318	2	27.4384	-0.022578	0	2
319	2	31.7875	0.645485	4	2
320	2	21.5409	-1.32719	3	2
321	2	20.9256	-1.50004	0	2
322	1	33.8321	0.886497	0	1
323	2	30.942	0.531058	0	2
324	1	28.135	0.101556	1	1
325	2	47.8387	2.25161	5	2
326	1	23.0559	-0.906681	1	1
327	1	36.81	1.22438	0	1
328	2	24.169	-0.646005	2	2
329	1	27.5433	0.00348136	2	1
330	1	26.1567	-0.251272	1	1
331	2	23.9979	-0.689783	2	2
332	2	46.2354	2.09167	0	2
333	2	33.165	0.81205	5	2
334	2	28.3424	0.147062	6	2
335	2	26.5706	-0.174635	0	2
336	2	23.985	-0.691926	5	2
337	1	23.12	-0.889627	0	1
338	2	24.9847	-0.471717	2	2
339	2	34.852	1.01058	0	2
340	1	26.7312	-0.134915	1	1
341	2	32.06	0.678053	2	2
342	2	18.63	-2.32691	0	2
343	2	23.0282	-0.915949	1	2
344	1	34.77	1.00462	1	1
345	2	23.4394	-0.81293	1	2
346	2	22.1975	-1.13431	4	2
347	1	28.4097	0.157948	2	1
348	2	27.1203	-0.0790986	0	2
349	2	38.45	1.40072	2	2
350	2	29.7579	0.364825	1	2
351	2	37.85	1.3323	4	2
352	2	49.4177	2.38077	4	2
353	1	28.864	0.229771	1	1
354	2	19.6667	-1.91633	2	2
355	2	16.6684	-3.02796	1	2
356	1	28.3655	0.152609	0	1
357	2	20.5757	-1.59879	0	2
358	2	32.3734	0.721722	0	2
359	1	26.79	-0.126297	0	1
360	1	31.7159	0.634609	2	1
361	2	55.2593	2.78675	1	2
362	2	41.1955	1.65463	5	2
363	2	29.2867	0.29585	0	2
364	2	24.3117	-0.611424	0	2
365	1	26.2389	-0.238445	0	1
366	2	25.4039	-0.391797	3	2
367	2	37.315	1.27268	0	2
368	1	46.6067	2.13085	0	1
369	2	22.15	-1.14562	0	2
370	1	31.6638	0.627143	1	1
371	2	23.26	-0.854294	0	2
372	2	28.42	0.159337	3	2
373	1	23.0333	-0.912744	6	1
374	2	24.6797	-0.535679	2	2
375	1	27.894	0.0550966	2	1
376	2	24.5055	-0.565635	4	2
377	1	31.7004	0.633062	0	1
378	2	33.72	0.873754	5	2
379	2	29.2945	0.299489	0	2
380	2	22.7871	-0.97602	2	2
381	2	22.2153	-1.1291	6	2
382	1	37.9744	1.34731	0	1
383	2	21.97	-1.19178	5	2
384	1	34.0036	0.909868	0	1
385	1	27.2836	-0.0511877	1	1
386	2	36.5801	1.19608	3	2
387	2	24.5894	-0.550104	1	2
388	1	20.87	-1.5125	3	1
389	1	37.965	1.34627	1	1
390	2	33.5287	0.852624	2	2
391	2	36.3156	1.17163	2	2
392	2	26.1913	-0.245397	10	2
393	2	43.4672	1.85164	1	2
394	2	23.26	-0.854294	1	2
395	2	33.2814	0.827402	1	2
396	2	21.4817	-1.33899	1	2
397	1	27.1967	-0.0658769	0	1
398	2	28.5682	0.18246	0	2
399	2	26.0315	-0.271139	9	2
400	2	27.42	-0.0285932	1	2
401	2	30.4523	0.464889	0	2
402	2	39.6225	1.50986	3	2
403	2	29.44	0.319409	0	2
404	2	17.7134	-2.68857	0	2
405	1	52.3715	2.58037	0	1
406	2	31.6267	0.621758	7	2
407	1	23.96	-0.698912	0	1
408	2	33.2814	0.827402	3	2
409	2	28.7154	0.208483	1	2
410	2	40.5155	1.59728	5	2
411	2	36.3989	1.17963	2	2
412	2	20.97	-1.49004	0	2
413	1	26.6767	-0.142797	0	1
414	2	17.1967	-2.84207	5	2
415	2	29.5345	0.332091	0	2
416	2	26.5811	-0.168104	4	2
417	2	20.934	-1.49939	4	2
418	2	30.793	0.513164	1	2
419	2	22.58	-1.0328	0	2
420	2	38.2574	1.37829	1	2
421	2	24.2194	-0.629456	3	2
422	1	37.7857	1.32719	0	1
423	1	37.111	1.24932	2	1
424	2	39.3127	1.48019	1	2
425	2	23.2404	-0.858252	0	2
426	2	22.2735	-1.11446	3	2
427	1	24.8889	-0.493764	0	1
428	2	30.0384	0.408024	0	2
429	2	27.618	0.0136094	1	2
430	2	24.5633	-0.555266	1	2
431	1	25.64	-0.347515	0	1
432	2	39.315	1.48082	0	2
433	2	25.91	-0.288693	7	2
434	1	32.9832	0.791391	0	1
435	2	26.5612	-0.176135	2	2
436	2	29.3235	0.303242	5	2
437	1	23.9889	-0.690988	1	1
438	2	26.5206	-0.185679	3	2
439	1	23.3	-0.844609	8	1
440	2	23.2938	-0.850804	1	2
441	2	24.3598	-0.600649	3	2
442	2	35.428	1.06759	6	2
443	2	28.2978	0.136406	0	2
444	2	22.6867	-0.997998	0	2
445	1	24.366	-0.599008	1	1
446	1	24.3922	-0.590823	0	1
447	2	24.9682	-0.475966	7	2
448	2	23.5674	-0.783767	0	2
449	1	27.9793	0.0730679	1	1
450	1	31.8956	0.660631	8	1
451	1	28.5914	0.187933	1	1
452	2	21.4783	-1.34003	5	2
453	2	26.6084	-0.160085	0	2
454	1	32.2805	0.709728	3	1
455	2	29.78	0.369678	5	2
456	2	27.1225	-0.0778288	4	2
457	1	21.88	-1.22707	6	1
458	2	45.5412	2.03831	6	2
459	1	28.2096	0.116944	0	1
460	2	29.7579	0.364825	5	2
461	2	37.791	1.32974	0	2
462	2	24.129	-0.655915	0	2
463	2	28.8831	0.232371	1	2
464	2	24.4917	-0.568609	1	2
465	2	22.7289	-0.986606	0	2
466	2	29.7579	0.364825	1	2
467	1	31.1475	0.562666	0	1
468	2	24.705	-0.528872	7	2
469	2	27.4327	-0.0275378	0	2
470	2	36.1639	1.15256	3	2
471	2	41.8618	1.71159	1	2
472	1	27.4457	-0.0186738	3	1
473	2	36.7217	1.21506	1	2
474	2	38.7217	1.42563	0	2
475	1	26.2923	-0.229013	5	1
476	1	40.4933	1.59652	6	1
477	2	24.09	-0.667734	0	2
478	1	32.9	0.78305	0	1
479	1	31.3808	0.590446	6	1
480	2	28.1206	0.0973148	8	2
481	2	29.165	0.274205	0	2
482	2	25.54	-0.37013	0	2
483	2	41.3671	1.67531	5	2
484	2	36.3893	1.17836	1	2
485	2	28.2147	0.11875	6	2
486	2	47.3494	2.21337	4	2
487	2	25.5367	-0.370469	1	2
488	2	20.8671	-1.51383	2	2
489	2	29.5125	0.3263	0	2
490	2	40.8267	1.62667	3	2
491	2	25.8244	-0.31043	3	2
492	1	28.1288	0.100071	1	1
493	2	28.99	0.248007	1	2
494	2	25.52	-0.373635	3	2
495	2	30.3614	0.453635	0	2
496	2	29.1957	0.281442	3	2
497	1	26.67	-0.14397	0	1
498	2	28.2454	0.124489	1	2
499	2	41.1955	1.65463	0	2
500	2	25.8157	-0.312977	0	2
501	2	20.902	-1.50854	0	2
502	2	27.4567	-0.016036	5	2
503	2	32.4908	0.736585	3	2
504	2	18.1	-2.53067	1	2
505	2	26.0657	-0.266764	0	2
506	2	30.2314	0.438486	1	2
507	1	30.9452	0.531544	1	1
508	2	28.7275	0.210532	1	2
509	2	37.92	1.34158	2	2
510	1	23.155	-0.883376	1	1
511	2	29.4933	0.324965	1	2
512	2	22.9574	-0.937015	0	2
513	2	27.25	-0.0591119	0	2
514	2	28.4618	0.165858	0	2
515	2	28.6356	0.19524	6	2
516	2	27.3188	-0.0459067	2	2
517	2	23.6544	-0.764549	8	2
518	1	34.38	0.960343	0	1
519	1	19.7899	-1.86891	6	1
520	1	27.46	-0.0131873	0	1
521	1	47.3496	2.21582	0	1
522	2	26.6331	-0.148662	1	2
523	2	23.7771	-0.734372	3	2
524	2	41.0124	1.63908	8	2
525	2	19.5703	-1.96196	5	2
526	2	22.88	-0.950353	0	2
527	2	31.64	0.623936	5	2
528	2	26.8124	-0.121938	5	2
529	2	31.5235	0.608756	0	2
530	1	33.0514	0.798046	0	1
531	1	24.8533	-0.499254	2	1
532	2	20.5648	-1.60335	0	2
533	1	25.835	-0.303463	0	1
534	1	23.7523	-0.739216	3	1
535	1	25.6021	-0.358293	3	1
536	2	21.7702	-1.25975	1	2
537	2	18.5613	-2.34632	1	2
538	2	26.4675	-0.195885	6	2
539	2	25.789	-0.318743	2	2
540	1	41.7317	1.69806	3	1
541	2	23.8294	-0.726109	0	2
542	2	23.02	-0.920935	3	2
543	2	24.0307	-0.681376	0	2
544	2	38.3083	1.38596	4	2
545	2	32.24	0.703229	0	2
546	2	20.3016	-1.67875	2	2
547	2	29.1801	0.277821	0	2
548	1	33.2814	0.827402	0	1
549	1	26.2367	-0.238879	1	1
550	2	23.9275	-0.70431	0	2
551	1	38.0426	1.35838	0	1
552	2	33.93	0.898753	1	2
553	2	30.7863	0.511721	3	2
554	2	19.4786	-1.99481	1	2
555	1	30.849	0.520036	0	1
556	1	31.0679	0.552069	0	1
557	2	22.2352	-1.12353	5	2
558	2	20.715	-1.55987	1	2
559	1	25.5498	-0.36663	1	1
560	2	48.3663	2.29639	2	2
561	2	45.31	2.01448	5	2
562	2	40.925	1.63224	0	2
563	2	31.7548	0.639649	0	2
564	2	20.5265	-1.61374	1	2
565	1	31.665	0.628428	0	1
566	2	29.26	0.291114	3	2
567	2	29.13	0.267201	6	2
568	2	27.084	-0.0867205	1	2
569	2	32.23	0.701069	1	2
570	2	37.68	1.31507	3	2
571	1	29.2887	0.297283	1	1
572	2	29.6299	0.342477	4	2
573	2	22.31	-1.10373	0	2
574	2	25.0804	-0.450363	1	2
575	2	33.1583	0.811756	6	2
576	2	48.22	2.28476	1	2
577	1	29.575	0.337224	4	1
578	2	27.1172	-0.081427	0	2
579	2	23.9775	-0.694341	1	2
580	1	26.4633	-0.19653	2	1
581	2	23.2243	-0.862988	1	2
582	2	20.1567	-1.73108	1	2
583	1	30.8766	0.522815	0	1
584	1	30.76	0.507516	2	1
585	2	32.2807	0.711629	6	2
586	2	26.7928	-0.124702	4	2
587	1	21.8555	-1.23269	0	1
588	2	21.7893	-1.24955	0	2
589	2	23.63	-0.767095	0	2
590	1	32.0883	0.683107	1	1
591	1	33.59	0.859014	4	1
592	2	18.6511	-2.31444	0	2
593	2	21.7893	-1.24955	6	2
594	2	22.5254	-1.04274	3	2
595	2	34.5225	0.97602	0	2
596	2	26.5718	-0.171422	0	2
597	2	40.49	1.59577	6	2
598	1	24.59	-0.549368	0	1
599	2	31.2686	0.576563	2	2
600	2	20.4981	-1.62115	2	2
601	2	30.6452	0.493645	6	2
602	2	47.5464	2.23081	5	2
603	1	33.3166	0.832165	1	1
604	1	32.1916	0.696759	3	1
605	1	28.0825	0.0911688	0	1
606	1	27.6151	0.0127653	0	1
607	2	28.0023	0.0801569	1	2
608	1	19.5541	-1.96924	2	1
609	2	41.5277	1.68048	1	2
610	2	39.2327	1.47391	5	2
611	2	17.7648	-2.65133	0	2
612	2	23.5162	-0.795438	6	2
613	2	44.3091	1.92974	9	2
614	2	26.6314	-0.150689	1	2
615	2	26.3614	-0.216792	0	2
616	2	34.28	0.941442	4	2
617	2	25.22	-0.421937	6	2
618	2	27.0121	-0.0932877	0	2
619	2	25.1525	-0.431296	8	2
620	2	33.9275	0.897174	0	2
621	2	45.8948	2.06072	0	2
622	1	24.745	-0.519794	2	1
623	2	35.956	1.1315	8	2
624	2	32.2021	0.698104	0	2
625	2	20.5747	-1.59955	5	2
626	2	25.61	-0.353573	2	2
627	1	26.4227	-0.206004	2	1
628	1	38.2482	1.3772	1	1
629	2	26.1556	-0.251708	4	2
630	1	35.7377	1.10703	9	1
631	2	20.635	-1.58234	0	2
632	1	24.245	-0.625859	0	1
633	1	28.15	0.103146	1	1
634	2	29.1212	0.26589	5	2
635	2	36.6492	1.20868	1	2
636	1	21.5225	-1.32923	5	1
637	1	46.2463	2.0945	8	1
638	1	35.1383	1.04165	0	1
639	1	31.6643	0.628171	3	1
640	1	22.8225	-0.965206	1	1
641	1	25.0593	-0.456794	2	1
642	1	25.827	-0.30711	2	1
643	1	30.265	0.441508	5	1
644	2	34.2525	0.938324	2	2
645	2	40.1094	1.55774	0	2
646	1	34.58	0.979593	1	1
647	2	21.287	-1.38983	0	2
648	2	30.1786	0.430486	3	2
649	2	29.07	0.259556	3	2
650	1	21.8265	-1.23721	0	1
651	2	30.141	0.424129	1	2
652	1	25.0593	-0.456794	0	1
653	2	23.4078	-0.821475	0	2
654	2	39.5783	1.5046	2	2
655	2	39.6686	1.51118	2	2
656	2	24.1889	-0.642111	0	2
657	2	28.9107	0.238445	5	2
658	1	19.1974	-2.09734	4	1
659	2	25.7931	-0.317856	7	2
660	2	27.4774	-0.00770126	0	2
661	2	29.7796	0.369114	0	2
662	1	24.9633	-0.477148	1	1
663	1	32.685	0.758205	0	1
664	1	29.26	0.291114	1	1
665	1	30.6989	0.5038	0	1
666	2	37.4643	1.28511	0	2
667	2	22.3152	-1.09542	2	2
668	2	30.1427	0.42436	0	2
669	2	23.3014	-0.844006	1	2
670	1	27.9383	0.0621769	1	1
671	1	22.6493	-1.00882	1	1
672	2	23.6276	-0.769788	0	2
673	1	30.1315	0.422629	0	1
674	2	21.3774	-1.36853	0	2
675	2	27.4086	-0.0303874	0	2
676	2	34.4	0.963527	5	2
677	2	34.0405	0.914666	1	2
678	2	27.3586	-0.0391489	2	2
679	1	24.2064	-0.638226	4	1
680	2	28.89	0.236492	3	2
681	2	25.544	-0.368097	5	2
682	1	38.1386	1.37015	5	1
683	2	24.2495	-0.625603	3	2
684	2	19.3683	-2.03747	0	2
685	1	32.26	0.706204	1	1
686	2	33.4992	0.849593	0	2
687	1	48.1708	2.27623	3	1
688	2	28.878	0.231071	1	2
689	1	26.5444	-0.179993	0	1
690	1	24.14	-0.652648	2	1
691	1	18.6529	-2.31138	2	1
692	2	24.0307	-0.681376	0	2
693	1	21.6617	-1.28994	2	1
694	2	27.4567	-0.016036	1	2
695	2	28.3219	0.140347	5	2
696	2	32.685	0.758205	0	2
697	2	24.1082	-0.662995	2	2
698	2	50.1167	2.43432	4	2
699	2	30.0208	0.405045	0	2
700	1	31.505	0.606472	6	1
701	2	39.565	1.50395	0	2
702	1	30.5156	0.475257	3	1
703	1	25.8427	-0.298606	1	1
704	2	32.1073	0.685507	3	2
705	1	25.4977	-0.378163	2	1
706	1	29.9844	0.401383	0	1
707	2	40.634	1.60564	2	2
708	2	30.9233	0.529358	3	2
709	1	36.5283	1.19027	1	1
710	2	24.4033	-0.588313	1	2
711	1	39.3946	1.48908	0	1
712	1	32.0978	0.68364	7	1
713	2	23.612	-0.775048	0	2
714	1	23.7359	-0.744634	5	1
715	1	24.5477	-0.560196	2	1
716	1	29.3118	0.301475	0	1
717	2	28.1917	0.111316	6	2
718	2	22.7267	-0.987636	5	2
719	1	21.9269	-1.21286	2	1
720	1	35.4203	1.06517	8	1
721	2	22.615	-1.01905	0	2
722	2	27.9564	0.0653483	1	2
723	2	36.068	1.14237	0	2
724	1	22.4175	-1.07602	0	1
725	2	29.837	0.376691	1	2
726	2	19.8086	-1.85991	3	2
727	2	26.1906	-0.245832	0	2
728	2	25.06	-0.454571	0	2
729	2	16.225	-3.30583	7	2
730	2	49.5686	2.39168	0	2
731	2	23.2665	-0.853231	0	2
732	2	24.115	-0.661944	0	2
733	2	21.4387	-1.35573	0	2
734	2	43.4041	1.84582	1	2
735	2	22.3431	-1.0912	0	2
736	2	27.4384	-0.022578	0	2
737	2	27.4636	-0.0112883	0	2
738	2	22.034	-1.17752	2	2
739	2	26.7833	-0.127467	6	2
740	2	25.6081	-0.353797	0	2
741	2	26.49	-0.193197	0	2
742	1	24.4073	-0.585806	3	1
743	2	25.5195	-0.373861	1	2
744	1	35.18	1.0462	0	1
745	2	36.32	1.17247	1	2
746	1	42.5734	1.77116	3	1
747	2	22.6736	-1.002	0	2
748	1	28.255	0.128637	0	1
749	1	26.5263	-0.18364	7	1
750	2	34.72	0.995744	3	2
751	2	18.7111	-2.28764	7	2
752	2	23.6432	-0.766246	0	2
753	2	38.0851	1.36317	0	2
754	1	39.1331	1.46029	6	1
755	2	27.7	0.0243719	4	2
756	2	24.31	-0.612187	3	2
757	2	21.35	-1.37393	1	2
758	2	20.485	-1.62272	1	2
759	2	38.012	1.35309	0	2
760	2	26.4462	-0.202126	1	2
761	1	49.5119	2.38801	4	1
762	1	41.9743	1.72265	5	1
763	1	33.208	0.816459	1	1
764	1	30.29	0.444533	7	1
765	1	22.6763	-1.00008	1	1
766	1	24.366	-0.599008	2	1
767	2	25.5542	-0.365502	0	2
768	2	36.4467	1.1826	3	2
769	2	22.5963	-1.02563	0	2
770	2	28.8891	0.23519	7	2
771	2	20.9367	-1.49874	0	2
772	2	27.1243	-0.0769823	0	2
773	2	36.3156	1.17163	2	2
774	1	25.83	-0.304457	0	1
775	1	30.117	0.419747	0	1
776	2	26.3607	-0.217224	0	2
777	1	24.1647	-0.647045	2	1
778	2	25.3745	-0.396585	4	2
779	1	25.935	-0.285615	8	1
780	2	21.95	-1.19932	1	2
781	2	21.97	-1.19178	0	2
782	2	29.0055	0.249748	0	2
783	2	22.4133	-1.07791	0	2
784	1	27.7985	0.0416828	4	1
785	1	24.815	-0.504998	3	1
786	2	24.84	-0.500927	5	2
787	2	20.8209	-1.52927	1	2
788	2	20.3868	-1.65091	0	2
789	2	41.0124	1.63908	8	2
790	1	34.6575	0.987636	0	1
791	2	20.7694	-1.54578	4	2
792	2	28.7933	0.219817	9	2
793	2	27.4351	-0.0257438	2	2
794	2	24.7067	-0.528387	5	2
795	1	37.6128	1.30463	0	1
796	2	42.8589	1.80239	2	2
797	1	32.2838	0.712853	0	1
798	1	28.4808	0.169496	2	1
799	2	27.6408	0.0167746	2	2
800	2	39.4433	1.491	1	2
801	2	30.23	0.437557	0	2
802	1	26.945	-0.103889	0	1
803	2	38.6333	1.41983	0	2
804	2	25.6276	-0.350655	0	2
805	2	33.4733	0.847476	1	2
806	2	26.0131	-0.27311	2	2
807	1	31.7	0.632804	0	1
808	2	29.2275	0.285615	2	2
809	2	27.08	-0.0872499	2	2
810	1	32.07	0.679647	7	1
811	2	28.1917	0.111316	3	2
812	2	20.9826	-1.47641	4	2
813	2	22.5139	-1.04784	4	2
814	2	29.93	0.391797	2	2
815	1	24.4969	-0.567369	0	1
816	2	26.9244	-0.107283	4	2
817	2	32.4493	0.731474	9	2
818	2	32.0245	0.674341	0	2
819	2	29.3329	0.305231	2	2
820	1	26.7928	-0.124702	0	1
821	2	23.0129	-0.922064	2	2
822	1	21.7621	-1.26419	2	1
823	2	29.0258	0.254104	6	2
824	2	53.5233	2.70458	0	2
825	2	28.1533	0.104313	7	2
826	2	27.566	0.00685727	6	2
827	2	22.5518	-1.03839	2	2
828	2	23.6933	-0.756659	1	2
829	2	28.2055	0.115776	1	2
830	2	37.1226	1.25162	1	2
831	2	31.8865	0.65932	6	2
832	1	29.7232	0.359644	5	1
833	1	26.7181	-0.137258	0	1
834	2	23.4356	-0.813664	3	2
835	2	30.0384	0.408024	0	2
836	2	33.2877	0.830377	5	2
837	2	26.6251	-0.156133	4	2
838	2	27.894	0.0550966	4	2
839	1	27.6041	0.0116048	0	1
840	1	30.6396	0.492573	2	1
841	1	31.8833	0.656438	2	1
842	2	26.4175	-0.206435	6	2
843	1	38.314	1.38817	3	1
844	2	18.3246	-2.43026	2	2
845	1	31.188	0.567369	3	1
846	1	32.488	0.736031	0	1
847	1	32.802	0.772913	0	1
848	2	27.1203	-0.0790986	0	2
849	2	29.1801	0.277821	0	2
850	2	28.037	0.084391	5	2
851	2	39.8565	1.52859	0	2
852	2	25.2131	-0.422514	4	2
853	2	35.4718	1.07264	7	2
854	2	31.0522	0.550595	0	2
855	2	23.3017	-0.843253	0	2
856	1	34.35	0.956502	1	1
857	2	25.7472	-0.329974	0	2
858	2	28.7154	0.208483	10	2
859	2	26.3876	-0.21161	0	2
860	2	23.2356	-0.860235	1	2
861	1	24.3533	-0.601913	0	1
862	1	35.8672	1.11918	0	1
863	2	26.79	-0.126297	1	2
864	2	32.4611	0.733268	1	2
865	2	33.2575	0.82325	1	2
866	2	28.7213	0.209669	0	2
867	2	29.9054	0.388382	3	2
868	1	28.5367	0.177206	1	1
869	2	42.515	1.76612	4	2
870	1	23.44	-0.812637	2	1
871	1	21.9507	-1.19781	1	1
872	2	25.8511	-0.294858	0	2
873	2	24.02	-0.686041	8	2
874	2	23.1139	-0.891195	2	2
875	1	33.3367	0.833658	2	1
876	2	29.335	0.305452	0	2
877	2	26.5506	-0.178064	0	2
878	1	37.3567	1.27506	0	1
879	2	24.945	-0.484253	5	2
880	2	22.4913	-1.05297	3	2
881	2	32.1191	0.686842	0	2
882	2	33.2997	0.830675	2	2
883	2	23.1605	-0.882441	5	2
884	2	40.3506	1.5761	3	2
885	2	33.1673	0.81293	6	2
886	2	25.515	-0.3742	1	2
887	2	30.415	0.460427	4	2
888	2	17.8723	-2.62398	3	2
889	2	25.5016	-0.37703	2	2
890	2	35.8988	1.12512	1	2
891	2	26.5206	-0.185679	0	2
892	1	29.2887	0.297283	0	1
893	2	27.1858	-0.0674628	4	2
894	1	31.1933	0.568733	5	1
895	1	29.98	0.400354	2	1
896	2	22.6525	-1.00794	0	2
897	2	24.605	-0.548264	1	2
898	2	49.5841	2.39538	0	2
899	2	24.5518	-0.559209	3	2
900	2	19.65	-1.92838	0	2
901	2	39.5791	1.50526	6	2
902	2	26.3253	-0.221763	0	2
903	2	22.04	-1.17478	0	2
904	1	23.315	-0.840547	1	1
905	2	20.2508	-1.69806	7	2
906	2	28.8795	0.231504	1	2
907	2	26.571	-0.173028	5	2
908	1	27.0493	-0.090957	0	1
909	2	25.05	-0.46031	3	2
910	1	31.6638	0.627143	1	1
911	2	19.505	-1.98563	0	2
912	2	23.6874	-0.758487	7	2
913	2	28.3424	0.147062	0	2
914	2	21.175	-1.42157	2	2
915	2	27.7311	0.0294375	5	2
916	1	35.2829	1.05481	4	1
917	2	22.8292	-0.963359	0	2
918	2	26.5165	-0.186859	2	2
919	2	24.1633	-0.647565	0	2
920	2	24.563	-0.556005	6	2
921	2	27.46	-0.0131873	8	2
922	1	30.73	0.505477	6	1
923	2	30.5964	0.489954	2	2
924	2	29.8072	0.372504	7	2
925	2	42.5144	1.76511	0	2
926	2	29.569	0.336107	4	2
927	2	40.7422	1.61802	4	2
928	2	40.378	1.58234	5	2
929	2	18.2583	-2.48191	0	2
930	2	22.6433	-1.0104	0	2
931	1	40.6869	1.60948	3	1
932	1	30.97	0.53507	5	1
933	1	36.1769	1.15338	6	1
934	1	19.2725	-2.07322	0	1
935	2	23.4455	-0.81117	0	2
936	2	19.4696	-1.9979	0	2
937	2	27.1967	-0.0664055	4	2
938	1	26.8986	-0.110892	0	1
939	2	30.0738	0.414683	6	2
940	2	31.7836	0.644706	0	2
941	1	24.9661	-0.476557	0	1
942	2	32.39	0.723091	3	2
943	2	26.888	-0.112378	1	2
944	2	32.0076	0.672488	0	2
945	1	22.785	-0.97704	0	1
946	1	21.62	-1.30537	0	1
947	2	33.3252	0.833061	1	2
948	2	22.7988	-0.973306	0	2
949	2	24.7744	-0.515572	0	2
950	2	37.9296	1.3434	1	2
951	2	22.71	-0.992113	0	2
952	2	19.6139	-1.94489	1	2
953	1	29.5345	0.332091	1	1
954	2	27.2571	-0.0568928	1	2
955	1	29.6593	0.347963	0	1
956	2	18.3195	-2.43432	8	2
957	2	21.2164	-1.41551	2	2
958	2	28.03	0.0831207	2	2
959	1	22.955	-0.938324	0	1
960	1	25.0879	-0.447563	0	1
961	1	27.1967	-0.0658769	6	1
962	2	30.931	0.530329	5	2
963	2	41.9312	1.71802	2	2
964	2	23.21	-0.8659	2	2
965	2	26.7035	-0.138962	0	2
966	1	26.9937	-0.0954071	1	1
967	2	24.694	-0.53203	0	2
968	2	24.6441	-0.542755	2	2
969	1	27.9909	0.0774055	1	1
970	1	23.394	-0.827848	8	1
971	1	28.4097	0.157948	1	1
972	2	25.7	-0.339011	0	2
973	1	23.8096	-0.730234	0	1
974	2	27.3133	-0.0464347	2	2
975	1	30.89	0.523541	3	1
976	2	29.9757	0.399555	6	2
977	1	34.9056	1.01799	0	1
978	1	22.8072	-0.970599	3	1
979	2	43.8625	1.89685	4	2
980	2	19.038	-2.1391	1	2
981	1	26.27	-0.23248	3	1
982	2	23.9139	-0.708236	0	2
983	2	37.5267	1.29286	3	2
984	1	32.5996	0.747979	0	1
985	2	25.05	-0.46031	0	2
986	1	23.1113	-0.89198	0	1
987	2	36.9678	1.2388	0	2
988	2	36.34	1.17457	6	2
989	1	30.6011	0.490192	1	1
990	1	33.5005	0.850501	1	1
991	2	20.9823	-1.48177	0	2
992	1	25.095	-0.442671	5	1
993	2	29.14	0.268185	7	2
994	2	22.9312	-0.942922	2	2
995	1	29.9145	0.390316	1	1
996	2	25.8473	-0.297724	1	2
997	2	29.2844	0.295519	7	2
998	2	43.6826	1.87683	1	2
999	1	27.8163	0.0446395	1	1
1000	2	31.9943	0.670373	2	2
1001	1	23.272	-0.852017	0	1
1002	1	29.97	0.398869	2	1
1003	2	27.6353	0.0163525	5	2
1004	2	24.9022	-0.491858	0	2
1005	2	20.0835	-1.75765	3	2
1006	1	31.5664	0.614225	1	1
1007	2	31.4495	0.597368	3	2
1008	1	25.36	-0.399669	0	1
1009	1	24.5735	-0.553052	1	1
1010	2	22.66	-1.00532	1	2
1011	2	22.6383	-1.01304	3	2
1012	2	19.92	-1.82256	7	2
1013	2	27.1003	-0.0848145	2	2
1014	2	26.6255	-0.153784	2	2
1015	2	43.3917	1.84235	3	2
1016	2	30.5607	0.48449	4	2
1017	1	32.2967	0.71435	1	1
1018	2	32.9883	0.792546	4	2
1019	1	37.9461	1.34522	1	1
1020	1	25.984	-0.27815	0	1
1021	2	30.5957	0.489717	1	2
1022	1	30.4096	0.458786	1	1
1023	1	26.2467	-0.23736	1	1
1024	2	19.7395	-1.89685	3	2
1025	2	19.5776	-1.95621	1	2
1026	1	26.53	-0.182996	0	1
1027	2	35.0981	1.03694	6	2
1028	2	20.3711	-1.65381	0	2
1029	2	31.8852	0.657878	8	2
1030	2	26.6631	-0.144716	3	2
1031	1	30.6834	0.50009	6	1
1032	2	22.2733	-1.11603	0	2
1033	2	24.1573	-0.648867	6	2
1034	2	25.138	-0.433381	0	2
1035	2	37.1	1.24886	0	2
1036	1	32.0529	0.676992	0	1
1037	2	22.3754	-1.08396	1	2
1038	2	29.2042	0.282759	4	2
1039	1	29.2676	0.294637	2	1
1040	2	21.9654	-1.19414	3	2
1041	2	25.3233	-0.404587	7	2
1042	2	41.5682	1.68352	5	2
1043	2	26.19	-0.246158	0	2
1044	2	26.6314	-0.150689	0	2
1045	2	28.3426	0.148768	10	2
1046	1	21.1092	-1.44245	4	1
1047	1	45.0244	1.99481	2	1
1048	2	26.35	-0.219168	1	2
1049	1	23.7904	-0.732992	0	1
1050	1	31.1698	0.565882	1	1
1051	2	28.2892	0.133957	1	2
1052	2	21.7893	-1.24955	1	2
1053	2	31.79	0.645745	0	2
1054	2	28.86	0.229338	2	2
1055	2	24.6847	-0.534949	0	2
1056	2	22.1242	-1.1542	8	2
1057	1	30.685	0.501406	3	1
1058	2	21.8233	-1.23834	5	2
1059	2	23.43	-0.816311	3	2
1060	2	28.1917	0.111316	1	2
1061	2	34.6422	0.985234	4	2
1062	2	26.7925	-0.125127	7	2
1063	2	30.205	0.434077	4	2
1064	2	27.78	0.0391489	2	2
1065	2	37.7433	1.32161	3	2
1066	2	33.6913	0.87221	0	2
1067	1	39.3306	1.48335	0	1
1068	2	20.2475	-1.69984	0	2
1069	2	27.6276	0.0140314	3	2
1070	1	21.8933	-1.22483	7	1
1071	2	30.7873	0.512442	7	2
1072	1	30.7055	0.504758	0	1
1073	2	28.9263	0.239531	4	2
1074	1	31.7647	0.642111	1	1
1075	1	33.9962	0.908911	1	1
1076	1	29.7591	0.36663	0	1
1077	2	25.242	-0.416754	0	2
1078	2	28.4075	0.156667	6	2
1079	2	29.3226	0.3028	3	2
1080	2	29.1031	0.263267	4	2
1081	2	26.5233	-0.184498	0	2
1082	2	24.9332	-0.487814	4	2
1083	2	23.8674	-0.721174	2	2
1084	2	43.3336	1.83662	2	2
1085	2	26.2675	-0.233238	2	2
1086	2	18.3048	-2.45527	8	2
1087	2	27.1333	-0.0742315	0	2
1088	2	31.1067	0.556497	3	2
1089	2	38.325	1.38928	5	2
1090	1	27.6458	0.0176187	3	1
1091	2	22.457	-1.06591	2	2
1092	1	28.0578	0.0865087	3	1
1093	2	19.9324	-1.81759	2	2
1094	1	41.8743	1.71434	5	1
1095	2	21.7288	-1.2741	2	2
1096	1	27.79	0.0408381	1	1
1097	2	20.0157	-1.78448	0	2
1098	2	25.3273	-0.4039	2	2
1099	2	21.315	-1.38157	1	2
1100	2	19.5776	-1.95621	1	2
1101	2	31.643	0.624577	0	2
1102	2	29.5961	0.338787	0	2
1103	2	27.9925	0.0780404	2	2
1104	1	25.1509	-0.431991	0	1
1105	2	26.165	-0.250184	2	2
1106	2	26.815	-0.121513	0	2
1107	2	26.8	-0.123851	7	2
1108	2	18.29	-2.47284	4	2
1109	1	29.3532	0.309434	0	1
1110	1	28.47	0.167355	7	1
1111	1	38.5375	1.40779	0	1
1112	2	39.9377	1.53885	1	2
1113	2	36.2343	1.16287	5	2
1114	2	26.6314	-0.150689	0	2
1115	1	32.8651	0.777757	4	1
1116	2	30.5705	0.486627	5	2
1117	2	29.74	0.360994	6	2
1118	2	25.7472	-0.329974	0	2
1119	2	21.5563	-1.32465	8	2
1120	2	30.2025	0.43315	3	2
1121	2	29.1779	0.275958	1	2
1122	2	29.7579	0.364825	6	2
1123	1	27.2619	-0.0555192	2	1
1124	2	28.097	0.0934997	3	2
1125	2	23.6748	-0.762008	0	2
1126	1	26.269	-0.233022	0	1
1127	1	28.5914	0.187933	0	1
1128	2	25.2476	-0.415603	0	2
1129	2	34.4433	0.968573	8	2
1130	1	26.6255	-0.153784	3	1
1131	2	22.2095	-1.1303	3	2
1132	2	31.64	0.623936	3	2
1133	2	31.4745	0.603178	7	2
1134	1	35.5085	1.08074	1	1
1135	1	27.976	0.0708468	4	1
1136	1	25.0879	-0.447563	0	1
1137	2	28.3977	0.155599	2	2
1138	2	25.7931	-0.317856	1	2
1139	1	37.72	1.3196	4	1
1140	2	30.5024	0.470774	0	2
1141	2	35.235	1.05004	0	2
1142	2	24.8975	-0.492335	4	2
1143	2	22.93	-0.943251	1	2
1144	1	26.5054	-0.189222	0	1
1145	2	22.2778	-1.11211	0	2
1146	2	32.7142	0.761867	2	2
1147	2	37.2389	1.26513	0	2
1148	2	25.0174	-0.465359	0	2
1149	2	31.8852	0.657878	2	2
1150	2	22.8626	-0.956002	7	2
1151	2	24.48	-0.569849	3	2
1152	2	57.3934	2.98902	3	2
1153	1	25.7362	-0.332983	0	1
1154	2	22.6083	-1.01976	2	2
1155	2	30.251	0.440577	3	2
1156	2	33.985	0.906999	0	2
1157	1	26.4993	-0.19094	0	1
1158	2	26.6251	-0.156133	1	2
1159	2	29.2945	0.299047	0	2
1160	2	22.6575	-1.00601	5	2
1161	2	22.3142	-1.09985	4	2
1162	1	28.5914	0.187933	0	1
1163	2	21.4933	-1.33744	0	2
1164	2	26.9927	-0.095831	0	2
1165	2	22.4153	-1.07678	4	2
1166	2	24.865	-0.49782	0	2
1167	1	24.4474	-0.57482	2	1
1168	2	32.2319	0.701339	2	2
1169	2	47.2366	2.20851	8	2
1170	2	44.129	1.91766	0	2
1171	2	34.451	0.970768	0	2
1172	2	27.43	-0.0277489	1	2
1173	1	26.5967	-0.164895	1	1
1174	1	36.1108	1.14807	3	1
1175	2	28.26	0.129168	0	2
1176	1	23.49	-0.802114	0	1
1177	2	29.6299	0.342477	1	2
1178	1	37.625	1.30685	1	1
1179	2	23.297	-0.847174	3	2
1180	2	23.7267	-0.748817	0	2
1181	2	23.21	-0.8659	0	2
1182	2	20.0604	-1.77319	0	2
1183	2	27.2083	-0.063234	2	2
1184	2	34.1288	0.922387	1	2
1185	2	24.5087	-0.565264	0	2
1186	2	38.7879	1.43149	0	2
1187	2	28.4144	0.159017	7	2
1188	1	29.5345	0.332091	1	1
1189	1	30.5152	0.474313	0	1
1190	2	24.0489	-0.676726	3	2
1191	2	27.4814	-0.00685727	5	2
1192	1	42.3639	1.75518	0	1
1193	2	23.8	-0.731474	0	2
1194	1	26.3108	-0.225981	1	1
1195	2	25.6267	-0.350879	1	2
1196	1	25.559	-0.365051	1	1
1197	1	22.98	-0.929513	5	1
1198	2	25.212	-0.422745	0	2
1199	1	23.0882	-0.898911	1	1
1200	2	18.0161	-2.55199	1	2
1201	2	26.4709	-0.19481	5	2
1202	2	19.6225	-1.94072	1	2
1203	2	22.85	-0.958838	4	2
1204	2	19.8438	-1.8435	1	2
1205	2	16.9	-2.95414	4	2
1206	2	34.915	1.01869	3	2
1207	2	24.6946	-0.530936	7	2
1208	1	24.8091	-0.505957	4	1
1209	2	23.0575	-0.904773	0	2
1210	2	24.38	-0.594092	3	2
1211	2	23.7262	-0.749096	2	2
1212	1	25.4225	-0.388382	0	1
1213	2	39.1551	1.46398	5	2
1214	2	34.848	1.01022	2	2
1215	1	35.58	1.08929	6	1
1216	2	30.52	0.476439	3	2
1217	1	37.6008	1.30216	0	1
1218	2	25.4767	-0.381111	1	2
1219	2	25.8481	-0.296621	2	2
1220	2	37.1226	1.25162	3	2
1221	2	31.3059	0.579805	4	2
1222	2	24.17	-0.645615	2	2
1223	1	29.6454	0.345275	0	1
1224	2	25.1788	-0.428057	0	2
1225	2	33.568	0.856576	0	2
1226	2	25.225	-0.421361	0	2
1227	1	29.9775	0.400012	0	1
1228	2	30.6422	0.493049	0	2
1229	2	47.6594	2.24109	2	2
1230	1	26.4843	-0.19352	0	1
1231	2	35.2396	1.05077	0	2
1232	2	38.0882	1.3637	0	2
1233	1	23.4893	-0.802696	0	1
1234	2	40.3273	1.56992	2	2
1235	2	29.9534	0.395559	4	2
1236	2	31.93	0.66431	4	2
1237	2	22.12	-1.15605	1	2
1238	2	20.2717	-1.69008	0	2
1239	2	23.6748	-0.762008	5	2
1240	1	34.7192	0.994878	3	1
1241	2	31.005	0.542389	0	2
1242	1	22.8072	-0.970599	1	1
1243	2	31.8993	0.660894	0	2
1244	2	23.1146	-0.890881	8	2
1245	2	18.7033	-2.29054	5	2
1246	2	33.8146	0.883999	2	2
1247	2	30.9517	0.532516	1	2
1248	1	24.86	-0.498059	1	1
1249	2	19.5776	-1.95621	1	2
1250	1	29.2281	0.286274	0	1
1251	2	24.8067	-0.507156	0	2
1252	2	35.12	1.0402	0	2
1253	2	38.0829	1.36237	0	2
1254	2	22.8072	-0.970599	4	2
1255	2	24.21	-0.636933	1	2
1256	1	22.5447	-1.03984	0	1
1257	2	28.652	0.197391	1	2
1258	2	25.6061	-0.35582	0	2
1259	2	27.3416	-0.0411549	0	2
1260	2	29.9532	0.393848	1	2
1261	1	26.4465	-0.201265	0	1
1262	1	27.0107	-0.0934997	2	1
1263	2	20.97	-1.49004	0	2
1264	2	21.9416	-1.20584	9	2
1265	2	21.2677	-1.39932	5	2
1266	2	31.4228	0.596107	3	2
1267	2	27.0289	-0.0920164	2	2
1268	2	45.0469	1.99635	1	2
1269	2	34.4827	0.975001	3	2
1270	2	26.582	-0.166928	6	2
1271	2	48.38	2.29935	1	2
1272	2	21.194	-1.41983	1	2
1273	2	25.4833	-0.380204	0	2
1274	2	24.6916	-0.533245	0	2
1275	2	25.6061	-0.35582	2	2
1276	1	22.4705	-1.05665	3	1
1277	1	31.5664	0.614225	1	1
1278	1	29.5576	0.334991	0	1
1279	2	31.0655	0.551823	4	2
1280	2	24.8418	-0.500449	4	2
1281	2	30.8535	0.521365	1	2
1282	2	25.0086	-0.467712	1	2
1283	1	28	0.0797336	1	1
1284	2	34.4152	0.965206	7	2
1285	2	22.1121	-1.15791	3	2
1286	1	19.5686	-1.96486	1	1
1287	2	26.4246	-0.205788	7	2
1288	2	19.7678	-1.87683	0	2
1289	2	28.2475	0.127041	5	2
1290	1	27.2667	-0.0534062	4	1
1291	2	24.1629	-0.647826	0	2
1292	2	26.5444	-0.179993	0	2
1293	2	41.1956	1.65671	1	2
1294	1	40.783	1.62351	2	1
1295	2	21.062	-1.4548	5	2
1296	1	26.4993	-0.19094	6	1
1297	2	34.9455	1.02207	1	2
1298	1	25.605	-0.357619	1	1
1299	2	29.9748	0.399326	6	2
1300	2	23.6276	-0.769788	5	2
1301	2	35.1016	1.03803	4	2
1302	1	24.8883	-0.494956	0	1
1303	1	23.2021	-0.868205	1	1
1304	1	28.9528	0.242137	0	1
1305	2	31.7098	0.633319	0	2
1306	1	29.0865	0.262175	1	1
1307	2	24.1052	-0.66431	2	2
1308	1	25.065	-0.453869	0	1
1309	1	27.2873	-0.0505539	2	1
1310	1	24.1167	-0.66155	6	1
1311	2	20.32	-1.67616	9	2
1312	2	36.9612	1.23789	6	2
1313	1	30.6834	0.50009	2	1
1314	2	18.8813	-2.20609	9	2
1315	1	27.8784	0.0516103	0	1
1316	2	23.4034	-0.823694	4	2
1317	2	31.6844	0.630743	3	2
1318	1	22.0363	-1.17562	1	1
1319	1	27.6972	0.0241608	1	1
1320	2	35.3215	1.05739	3	2
1321	2	19.33	-2.05025	1	2
1322	2	21.7686	-1.26278	7	2
1323	2	24.0911	-0.666153	1	2
1324	2	28.5325	0.176135	3	2
1325	2	24.21	-0.636933	1	2
1326	2	30.38	0.454805	0	2
1327	2	25.84	-0.302359	1	2
1328	2	20.1667	-1.72873	3	2
1329	2	25.9371	-0.284956	1	2
1330	2	25.78	-0.319743	0	2
1331	1	28.315	0.138536	6	1
1332	2	23.0742	-0.902234	0	2
1333	2	23.3014	-0.844006	1	2
1334	2	27.252	-0.0583722	0	2
1335	2	21.384	-1.36692	0	2
1336	2	21.14	-1.4309	0	2
1337	1	35.3883	1.06108	1	1
1338	2	33.6254	0.8636	1	2
1339	1	28.1683	0.105798	7	1
1340	2	41.385	1.67616	1	2
1341	2	23.7548	-0.738523	2	2
1342	1	31.4644	0.600902	0	1
1343	2	38.075	1.36157	1	2
1344	2	19.2643	-2.07595	3	2
1345	2	29.433	0.318965	1	2
1346	2	32.1733	0.694743	2	2
1347	2	20.6785	-1.5656	3	2
1348	1	31.8104	0.648607	1	1
1349	1	23.628	-0.767803	0	1
1350	1	24.3922	-0.590823	1	1
1351	2	26.26	-0.235407	0	2
1352	2	23.045	-0.910506	5	2
1353	2	24.2762	-0.620223	5	2
1354	1	24.2169	-0.629714	7	1
1355	1	33.0012	0.795004	2	1
1356	1	24.7175	-0.525115	4	1
1357	2	28.3121	0.137684	1	2
1358	1	21.6233	-1.30413	0	1
1359	1	23.1	-0.89544	3	1
1360	2	26.1175	-0.259883	0	2
1361	2	25.695	-0.340128	5	2
1362	2	38.5733	1.41007	2	2
1363	2	33.0575	0.798336	5	2
1364	2	19.8075	-1.8611	2	2
1365	2	36.2772	1.16703	0	2
1366	1	24.7795	-0.51485	0	1
1367	1	24.1725	-0.645225	3	1
1368	2	32.8903	0.781331	0	2
1369	2	20.846	-1.52184	6	2
1370	2	30.2314	0.438486	3	2
1371	2	33.9286	0.89749	2	2
1372	1	31.3808	0.590446	0	1
1373	2	34.0433	0.914987	1	2
1374	1	23.5674	-0.783767	6	1
1375	2	22.2025	-1.1327	6	2
1376	2	31.1807	0.566873	4	2
1377	1	23	-0.927241	4	1
1378	1	25.3311	-0.40287	1	1
1379	1	32.6806	0.757502	2	1
1380	1	25.685	-0.342812	6	1
1381	2	24.7756	-0.515331	1	2
1382	1	29.7725	0.368097	1	1
1383	2	20.0193	-1.78241	1	2
1384	1	23.3323	-0.838746	0	1
1385	2	30.0053	0.404358	0	2
1386	2	36.4871	1.18472	3	2
1387	2	23.054	-0.907954	0	2
1388	2	26.926	-0.107071	2	2
1389	2	30.18	0.431528	0	2
1390	2	38.31	1.38651	1	2
1391	1	23.6675	-0.763701	0	1
1392	1	37.497	1.28922	3	1
1393	2	24.1241	-0.658795	8	2
1394	2	43.0451	1.81484	2	2
1395	2	27.98	0.0746547	1	2
1396	2	25.0174	-0.465359	0	2
1397	2	29.9143	0.389975	1	2
1398	2	36.9043	1.23133	5	2
1399	1	30.4096	0.458786	0	1
1400	2	39.1551	1.46398	0	2
1401	2	31.778	0.643148	8	2
1402	2	30.1786	0.430486	2	2
1403	2	42.4338	1.76013	5	2
1404	1	22.5963	-1.02563	0	1
1405	2	23.8492	-0.723913	1	2
1406	2	25.71	-0.337894	0	2
1407	1	32.4974	0.737692	2	1
1408	2	29.682	0.351328	3	2
1409	2	42.7817	1.79706	1	2
1410	1	30.5929	0.489479	0	1
1411	2	21.517	-1.3323	1	2
1412	2	24.2679	-0.622014	0	2
1413	2	32.76	0.767661	2	2
1414	1	25.7684	-0.322853	1	1
1415	2	28.4819	0.170138	2	2
1416	1	27.7421	0.030704	0	1
1417	2	23.9067	-0.711629	7	2
1418	1	24.294	-0.615117	4	1
1419	2	25.9858	-0.277821	7	2
1420	2	27.58	0.00875625	2	2
1421	1	41.8132	1.70478	0	1
1422	2	42.4586	1.76212	1	2
1423	2	27.4636	-0.0112883	7	2
1424	2	25.6061	-0.35582	1	2
1425	2	24.4967	-0.567617	0	2
1426	2	23.8072	-0.730785	3	2
1427	2	34.9369	1.02082	7	2
1428	2	25.7341	-0.333652	5	2
1429	2	24.7008	-0.5296	0	2
1430	1	29.9861	0.401955	6	1
1431	2	25.0879	-0.447563	10	2
1432	2	46.9861	2.16805	9	2
1433	2	28.6632	0.199112	6	2
1434	2	33.9315	0.899385	1	2
1435	2	28.9237	0.239096	2	2
1436	2	28.3496	0.149622	0	2
1437	2	39.4604	1.49486	2	2
1438	2	32.4166	0.725834	1	2
1439	2	24.7996	-0.509918	5	2
1440	2	22.1509	-1.14481	3	2
1441	2	23.297	-0.847174	0	2
1442	2	21.456	-1.35072	2	2
1443	1	36.7139	1.21462	2	1
1444	2	42.6551	1.78138	0	2
1445	2	27.4351	-0.0257438	1	2
1446	1	32.5637	0.74547	1	1
1447	1	37.7633	1.32567	5	1
1448	1	29.3727	0.311205	4	1
1449	2	36.8196	1.22483	0	2
1450	1	25.8864	-0.290894	0	1
1451	1	39.1777	1.46645	3	1
1452	2	27.4433	-0.0190959	1	2
1453	2	33.1664	0.812637	4	2
1454	1	31.6638	0.627143	1	1
1455	1	22.99	-0.928864	0	1
1456	2	27.7138	0.0266936	5	2
1457	1	34.7031	0.993841	1	1
1458	2	18.5498	-2.35131	5	2
1459	2	25.307	-0.407336	5	2
1460	2	31.6674	0.629199	3	2
1461	2	39.465	1.49745	2	2
1462	2	24.6925	-0.532273	0	2
1463	1	29.7329	0.360319	0	1
1464	2	27.0632	-0.0892622	6	2
1465	1	37.7032	1.31758	5	1
1466	2	37.0053	1.24198	0	2
1467	1	29.11	0.263923	0	1
1468	1	32.6	0.748258	3	1
1469	1	28.06	0.0878853	2	1
1470	1	22.1325	-1.15133	3	1
1471	2	22.5689	-1.0355	7	2
1472	2	29.778	0.368888	6	2
1473	2	24.339	-0.603432	0	2
1474	2	37.82	1.33179	4	2
1475	2	28.4377	0.161154	1	2
1476	1	29.2887	0.297283	1	1
1477	2	23.4352	-0.814693	1	2
1478	2	39.18	1.46799	3	2
1479	2	31.78	0.644057	0	2
1480	2	35.5085	1.08074	5	2
1481	1	25.4125	-0.389975	3	1
1482	1	23.9626	-0.697566	0	1
1483	2	31.6489	0.625346	6	2
1484	2	42.2875	1.75273	4	2
1485	1	30.8483	0.518949	2	1
1486	2	20.4429	-1.63304	0	2
1487	2	35.9088	1.12711	2	2
1488	1	22.355	-1.08777	0	1
1489	1	25.0362	-0.461483	2	1
1490	2	22.41	-1.07866	6	2
1491	2	29.6689	0.349309	3	2
1492	2	23.741	-0.743521	2	2
1493	2	29.8	0.37126	3	2
1494	2	28.3424	0.147062	1	2
1495	1	23.6276	-0.769788	2	1
1496	1	27.9075	0.0575268	3	1
1497	1	23.9	-0.712581	0	1
1498	2	29.6777	0.349982	0	2
1499	2	20.3325	-1.67445	5	2
1500	2	24.71	-0.527538	4	2
1501	1	26.3202	-0.223709	0	1
1502	2	32.9429	0.788077	1	2
1503	2	20.78	-1.54439	1	2
1504	2	31.7548	0.639649	0	2
1505	2	19.5776	-1.95621	0	2
1506	2	30.0833	0.415373	6	2
1507	1	28.1508	0.103677	0	1
1508	1	29.837	0.376691	0	1
1509	1	29.3111	0.301254	0	1
1510	2	25.75	-0.326634	0	2
1511	2	28.2553	0.128956	0	2
1512	2	29.44	0.319409	1	2
1513	2	21.34	-1.37556	0	2
1514	2	24.849	-0.50021	1	2
1515	2	23.9139	-0.708236	3	2
1516	2	34.2586	0.93898	2	2
1517	2	32.0175	0.673546	1	2
1518	2	20.7453	-1.5542	3	2
1519	1	25.798	-0.316968	1	1
1520	2	19.6631	-1.92032	0	2
1521	2	32.5695	0.746027	9	2
1522	2	23.394	-0.827848	7	2
1523	1	26.9125	-0.108557	0	1
1524	2	34.2287	0.935053	0	2
1525	2	35.8709	1.12076	7	2
1526	1	27.2645	-0.054357	3	1
1527	1	32.2468	0.703769	7	1
1528	2	33.03	0.796886	4	2
1529	2	24.2285	-0.627914	0	2
1530	2	30.0425	0.409859	6	2
1531	1	32.0033	0.670902	0	1
1532	1	27.8	0.0425275	2	1
1533	2	28.0709	0.0896859	1	2
1534	2	30.426	0.462774	0	2
1535	2	33.8945	0.892608	2	2
1536	2	24.7996	-0.509918	4	2
1537	1	29	0.249313	0	1
1538	2	44.6284	1.95335	3	2
1539	1	50.6359	2.46837	0	1
1540	2	25.3848	-0.395673	0	2
1541	1	44.245	1.92433	0	1
1542	2	26.7414	-0.133851	0	2
1543	2	27.8248	0.0460123	0	2
1544	2	18.53	-2.36147	1	2
1545	2	21.8385	-1.23562	1	2
1546	1	36.1053	1.14725	1	1
1547	2	23.0455	-0.909549	1	2
1548	2	43.9308	1.90197	4	2
1549	2	34.8662	1.01269	6	2
1550	2	34.23	0.935379	0	2
1551	2	31.7548	0.639649	9	2
1552	2	25.62	-0.352226	3	2
1553	1	23.8183	-0.728583	0	1
1554	2	22.307	-1.10508	5	2
1555	2	34.4581	0.972628	6	2
1556	2	31.0533	0.550841	0	2
1557	1	29.176	0.27552	0	1
1558	2	34.6233	0.982837	5	2
1559	1	33.1224	0.807072	0	1
1560	1	28.0185	0.0818504	5	1
1561	2	36.0867	1.14521	8	2
1562	2	36.9944	1.24107	7	2
1563	2	38.3967	1.39707	6	2
1564	1	27.335	-0.0430555	1	1
1565	1	24.7875	-0.513164	4	1
1566	2	31.2475	0.573824	3	2
1567	2	24.212	-0.631258	5	2
1568	2	45.2585	2.01048	4	2
1569	1	24.1969	-0.640297	2	1
1570	2	18.315	-2.43843	0	2
1571	2	20.9092	-1.50592	0	2
1572	2	26.265	-0.233455	0	2
1573	2	26.598	-0.164575	5	2
1574	2	39.8565	1.52859	1	2
1575	2	36.3118	1.17079	4	2
1576	2	30.4206	0.46207	0	2
1577	2	20.4157	-1.64354	3	2
1578	1	30.3159	0.448729	2	1
1579	2	32.3036	0.714622	8	2
1580	2	21.7893	-1.24955	1	2
1581	2	37.2558	1.26701	2	2
1582	2	32.7912	0.772202	2	2
1583	2	25.0067	-0.467947	0	2
1584	2	28.3419	0.144503	1	2
1585	2	26.4671	-0.1961	3	2
1586	2	20.3607	-1.66173	1	2
1587	2	32.0386	0.675931	10	2
1588	2	31.9525	0.66668	0	2
1589	1	28.1767	0.107071	4	1
1590	2	29.1212	0.26589	0	2
1591	2	23.4026	-0.825621	0	2
1592	2	22.771	-0.978741	1	2
1593	1	25.2338	-0.419056	4	1
1594	1	27.2745	-0.0524554	1	1
1595	1	26.138	-0.256066	0	1
1596	2	21.09	-1.44724	0	2
1597	2	22.4649	-1.06201	0	2
1598	2	32.6404	0.754975	4	2
1599	2	35.8639	1.118	8	2
1600	1	38.682	1.42331	1	1
1601	2	46.5939	2.12577	4	2
1602	2	28.1936	0.113227	0	2
1603	2	32.488	0.736031	2	2
1604	2	22.71	-0.992113	3	2
1605	2	24.979	-0.473368	0	2
1606	2	18.8909	-2.19658	0	2
1607	2	31.8588	0.653301	6	2
1608	1	25.0362	-0.461483	0	1
1609	2	27.63	0.0145589	0	2
1610	1	27.3113	-0.0467516	0	1
1611	2	19.8394	-1.84814	3	2
1612	2	36.7998	1.22082	1	2
1613	2	38.955	1.44694	4	2
1614	2	25.2309	-0.420439	0	2
1615	2	24.6625	-0.538604	0	2
1616	2	53.2628	2.66579	3	2
1617	2	36.13	1.1499	0	2
1618	1	25.544	-0.368097	2	1
1619	1	25.38	-0.396243	0	1
1620	2	30.8408	0.517984	1	2
1621	1	29.1589	0.272015	2	1
1622	2	39.9377	1.53885	2	2
1623	2	29.522	0.327858	1	2
1624	2	34.34	0.953838	3	2
1625	2	38.627	1.4181	1	2
1626	1	21.6433	-1.29383	0	1
1627	2	32.0482	0.676196	2	2
1628	2	29.8783	0.384517	4	2
1629	2	25.472	-0.381565	4	2
1630	2	35.424	1.06591	1	2
1631	1	25.09	-0.445582	4	1
1632	2	30.5051	0.471245	3	2
1633	2	24.4767	-0.570345	0	2
1634	2	22.8469	-0.959507	2	2
1635	1	28.88	0.231721	1	1
1636	2	34.9307	1.02047	4	2
1637	1	28.9748	0.246593	0	1
1638	1	22.717	-0.989356	3	1
1639	2	37.1226	1.25162	6	2
1640	2	28.846	0.227389	0	2
1641	2	23.534	-0.79168	1	2
1642	1	24.6792	-0.536166	1	1
1643	2	24.7175	-0.525115	2	2
1644	2	38.3943	1.39428	1	2
1645	2	26.8014	-0.123639	1	2
1646	2	28.255	0.128637	3	2
1647	2	31.184	0.567121	0	2
1648	2	17.1648	-2.85425	1	2
1649	2	36.745	1.21594	0	2
1650	1	26.7671	-0.130232	0	1
1651	2	23.7042	-0.754694	2	2
1652	2	30.8083	0.514368	3	2
1653	2	34.1388	0.92271	1	2
1654	1	25.6369	-0.347963	3	1
1655	2	33.8945	0.892608	1	2
1656	1	24.7985	-0.51124	0	1
1657	1	30.7864	0.511961	2	1
1658	2	20.5667	-1.60183	3	2
1659	1	29.14	0.268185	2	1
1660	2	20.0633	-1.77166	8	2
1661	2	21.8625	-1.23156	0	2
1662	2	29.1801	0.277821	4	2
1663	1	23.1724	-0.87592	0	1
1664	2	39.1891	1.46955	5	2
1665	1	26.904	-0.110361	6	1
1666	2	28.5733	0.183854	3	2
1667	1	33.3391	0.834255	1	1
1668	1	36.8088	1.22394	0	1
1669	2	27.229	-0.0604858	8	2
1670	2	24.2104	-0.634093	4	2
1671	1	38.9512	1.44634	2	1
1672	2	31.0083	0.543244	3	2
1673	1	29.626	0.341917	0	1
1674	1	37.6871	1.31557	0	1
1675	2	22.7209	-0.989012	0	2
1676	1	27.1246	-0.0756068	2	1
1677	1	26.9817	-0.0971028	3	1
1678	1	25.5698	-0.363247	0	1
1679	2	39.1119	1.45968	2	2
1680	1	28.6089	0.19137	0	1
1681	2	26.065	-0.266983	0	2
1682	2	21.104	-1.44454	0	2
1683	2	32.8691	0.778185	0	2
1684	2	28.1809	0.107708	2	2
1685	2	24.3722	-0.596611	3	2
1686	2	34.7361	0.998693	0	2
1687	1	26.2627	-0.233889	0	1
1688	2	20.3	-1.68091	0	2
1689	2	24.6875	-0.534462	1	2
1690	2	23.0282	-0.915949	0	2
1691	2	24.9027	-0.491501	0	2
1692	2	26.6592	-0.145356	0	2
1693	2	22.892	-0.947209	6	2
1694	2	31.8617	0.653562	0	2
1695	2	23.0433	-0.911145	0	2
1696	2	24.961	-0.479158	0	2
1697	2	31.1171	0.557483	0	2
1698	2	22.19	-1.13592	2	2
1699	1	26.0518	-0.268513	1	1
1700	2	27.4978	-0.00485282	0	2
1701	2	20.98	-1.48748	9	2
1702	1	34.8675	1.01357	5	1
1703	1	27.6671	0.01994	0	1
1704	2	28.932	0.239748	4	2
1705	1	30.5571	0.483304	0	1
1706	2	29.75	0.362121	3	2
1707	2	38.36	1.3915	2	2
1708	1	21.5984	-1.31158	6	1
1709	1	29.7121	0.358406	1	1
1710	1	29.75	0.362121	1	1
1711	2	21.6459	-1.29334	4	2
1712	1	23.1273	-0.888217	0	1
1713	2	32.3879	0.722817	3	2
1714	2	28.1288	0.100071	6	2
1715	1	32.4113	0.72556	2	1
1716	1	27.8255	0.0465404	0	1
1717	2	30.6732	0.49782	0	2
1718	1	30.535	0.478094	0	1
1719	2	23.912	-0.710814	3	2
1720	1	25.4383	-0.386335	3	1
1721	2	40.46	1.59276	1	2
1722	1	28.37	0.153784	0	1
1723	2	26.15	-0.25356	2	2
1724	1	35.6218	1.09331	3	1
1725	2	40.2875	1.56776	6	2
1726	1	27.225	-0.0609086	0	1
1727	2	21.65	-1.29188	4	2
1728	2	22.7054	-0.995224	2	2
1729	2	20.7538	-1.55138	0	2
1730	2	34.4067	0.963862	1	2
1731	2	23.4634	-0.80678	0	2
1732	2	26.215	-0.242897	2	2
1733	1	21.2356	-1.41235	1	1
1734	1	27.1441	-0.072539	0	1
1735	2	24.1831	-0.643667	0	2
1736	2	46.661	2.1329	6	2
1737	2	21.4766	-1.34055	5	2
1738	1	23.6748	-0.762008	2	1
1739	2	30.9767	0.536166	6	2
1740	2	22.8764	-0.951513	0	2
1741	1	26.7878	-0.127147	3	1
1742	2	40	1.54998	2	2
1743	2	27.3133	-0.0464347	1	2
1744	1	22.3152	-1.09542	4	1
1745	2	33.4713	0.845815	6	2
1746	2	23.0282	-0.915949	4	2
1747	2	23.1914	-0.869436	1	2
1748	2	27.3416	-0.0411549	8	2
1749	2	23.9443	-0.701609	0	2
1750	2	20.432	-1.63867	0	2
1751	2	21.0797	-1.45056	1	2
1752	1	23.9233	-0.705121	0	1
1753	1	29.288	0.29618	0	1
1754	1	31.1698	0.565882	0	1
1755	2	35.1063	1.03911	1	2
1756	2	23.0067	-0.92465	2	2
1757	2	35.978	1.1325	1	2
1758	1	26.915	-0.10792	1	1
1759	2	19.795	-1.86469	1	2
1760	1	23.8675	-0.720901	4	1
1761	2	20.0828	-1.76013	1	2
1762	2	28.25	0.127786	6	2
1763	2	35.3517	1.0596	2	2
1764	1	29.018	0.251926	2	1
1765	1	26.894	-0.111953	1	1
1766	2	24.17	-0.645615	7	2
1767	2	36.0227	1.13712	7	2
1768	2	36.67	1.21088	4	2
1769	2	24.0467	-0.677124	2	2
1770	1	23.73	-0.747979	1	1
1771	1	33.97	0.905408	0	1
1772	1	31.3808	0.590446	0	1
1773	2	23.5167	-0.795148	0	2
1774	2	33.73	0.874991	1	2
1775	1	21.7689	-1.26208	0	1
1776	2	21.3051	-1.38376	0	2
1777	1	22.4684	-1.05905	4	1
1778	2	26.6233	-0.157948	6	2
1779	2	25.8424	-0.300482	3	2
1780	2	26.5967	-0.164895	0	2
1781	1	28.1661	0.105162	0	1
1782	2	26.9533	-0.10198	3	2
1783	2	34.0244	0.913384	4	2
1784	2	44.135	1.91899	7	2
1785	2	27.7722	0.0368263	0	2
1786	1	22.82	-0.96571	1	1
1787	1	36.6035	1.20192	1	1
1788	2	32.0624	0.678585	1	2
1789	2	24.29	-0.615627	4	2
1790	1	30.92	0.528872	0	1
1791	2	21.99	-1.18281	0	2
1792	2	30.0275	0.405503	3	2
1793	2	20.1214	-1.73773	1	2
1794	2	29.7673	0.367759	1	2
1795	2	21.4125	-1.36237	0	2
1796	2	29.085	0.261957	0	2
1797	2	20.9823	-1.48177	2	2
1798	2	27.17	-0.0693662	7	2
1799	1	27.1222	-0.078252	0	1
1800	2	26.1253	-0.258247	1	2
1801	2	29.7579	0.364825	3	2
1802	2	20.6714	-1.57137	0	2
1803	2	29.1707	0.274862	2	2
1804	2	31.6657	0.628942	0	2
1805	2	35.2783	1.05389	0	2
1806	1	26.9954	-0.0951951	2	1
1807	2	22.0469	-1.17184	0	2
1808	2	26.0905	-0.26294	0	2
1809	2	25.5695	-0.363473	0	2
1810	2	26.9507	-0.102404	0	2
1811	1	27.7059	0.0251106	0	1
1812	1	24.2762	-0.620223	0	1
1813	2	20.6773	-1.56632	0	2
1814	1	21.8136	-1.23971	0	1
1815	1	24.9847	-0.471481	0	1
1816	2	29.967	0.398184	0	2
1817	1	23.72	-0.750493	2	1
1818	1	35.7274	1.10198	0	1
1819	2	26.6522	-0.146209	6	2
1820	2	19.9285	-1.8209	4	2
1821	2	32.5107	0.7388	3	2
1822	2	23.9796	-0.693804	3	2
1823	1	30.135	0.423668	0	1
1824	2	31.9848	0.669581	0	2
1825	2	24.13	-0.654084	0	2
1826	2	22.2662	-1.11682	2	2
1827	2	22.24	-1.12076	0	2
1828	2	23.9771	-0.694609	5	2
1829	2	35.0286	1.02903	5	2
1830	2	28.9718	0.245615	1	2
1831	2	29.5345	0.332091	1	2
1832	1	28.788	0.218952	0	1
1833	2	31.89	0.659844	1	2
1834	1	30.3592	0.453167	1	1
1835	2	23.744	-0.742548	1	2
1836	2	20.2544	-1.69494	1	2
1837	2	46.4011	2.10696	1	2
1838	2	44.8658	1.98412	2	2
1839	1	32.2805	0.709728	0	1
1840	2	32.91	0.784341	3	2
1841	2	24.66	-0.539458	0	2
1842	2	24.5332	-0.562913	0	2
1843	1	25.18	-0.42771	2	1
1844	2	25.4039	-0.391797	0	2
1845	2	24.102	-0.664836	3	2
1846	1	31.0112	0.545447	7	1
1847	2	20.34	-1.66975	4	2
1848	2	38.573	1.4095	7	2
1849	2	22.1788	-1.13874	0	2
1850	1	29.0252	0.253342	2	1
1851	2	15.39	-3.63913	4	2
1852	1	30.2029	0.433381	7	1
1853	2	36.5801	1.19608	0	2
1854	1	26.43	-0.205034	4	1
1855	2	27.502	-0.00369235	0	2
1856	2	33.8186	0.884311	1	2
1857	2	36.5801	1.19608	0	2
1858	2	20.6191	-1.58604	3	2
1859	2	31.9577	0.667075	3	2
1860	2	59.0988	3.09668	3	2
1861	2	22.6575	-1.00601	0	2
1862	2	32.2805	0.709728	0	2
1863	2	29.9145	0.390316	4	2
1864	2	27.6525	0.0182518	0	2
1865	1	37.747	1.32212	4	1
1866	2	32.7229	0.763136	0	2
1867	1	27.5857	0.00917825	0	1
1868	1	27.975	0.070318	0	1
1869	2	29.1212	0.26589	7	2
1870	2	33.145	0.809705	1	2
1871	2	30.0711	0.414109	2	2
1872	2	36.6642	1.21022	2	2
1873	2	31.47	0.601661	2	2
1874	1	43.8021	1.88674	0	1
1875	1	30.3578	0.452934	0	1
1876	1	33.4596	0.844458	6	1
1877	2	18.2457	-2.48886	1	2
1878	1	38.0231	1.3552	3	1
1879	2	32.3671	0.720901	2	2
1880	2	24.3277	-0.60774	0	2
1881	2	24.4782	-0.570097	5	2
1882	2	21.7288	-1.2741	4	2
1883	2	27.7322	0.0296486	0	2
1884	2	22.1073	-1.15997	7	2
1885	2	30.8966	0.52572	2	2
1886	2	66.3833	3.87824	1	2
1887	1	28.1063	0.0951951	0	1
1888	1	22.7567	-0.98147	0	1
1889	2	28.23	0.121407	1	2
1890	2	32.5524	0.743799	4	2
1891	2	29.7225	0.359419	5	2
1892	2	32.5087	0.738523	3	2
1893	1	37.6565	1.31158	2	1
1894	2	27.3359	-0.0427387	7	2
1895	1	31.0933	0.555759	0	1
1896	2	28.3424	0.147062	1	2
1897	2	32.1571	0.692462	5	2
1898	2	35.5073	1.07791	4	2
1899	2	22.355	-1.08777	0	2
1900	2	22.8275	-0.964198	0	2
1901	1	26	-0.275301	0	1
1902	1	34.2108	0.931954	5	1
1903	1	34.6656	0.988668	1	1
1904	2	20.1753	-1.72079	0	2
1905	2	31.7548	0.639649	0	2
1906	2	16.8827	-2.97113	7	2
1907	2	46.1029	2.08052	7	2
1908	2	21.8712	-1.22886	0	2
1909	2	24.8974	-0.492573	0	2
1910	2	19.6704	-1.91369	1	2
1911	2	24.0565	-0.673546	0	2
1912	1	24.78	-0.514609	0	1
1913	2	36.65	1.20934	3	2
1914	2	23.4418	-0.812343	2	2
1915	2	25.69	-0.340576	3	2
1916	2	29.08	0.261193	4	2
1917	1	26.6084	-0.160085	2	1
1918	2	21.2817	-1.39707	1	2
1919	2	25.4162	-0.389292	2	2
1920	1	24.3922	-0.590823	0	1
1921	2	28.8269	0.225007	1	2
1922	2	29.3793	0.312534	0	2
1923	2	29.6843	0.352001	1	2
1924	2	21.1061	-1.44394	0	2
1925	2	27.1335	-0.07402	5	2
1926	2	32.0678	0.67885	2	2
1927	2	40.7213	1.61296	1	2
1928	2	21.815	-1.23925	6	2
1929	2	26.476	-0.19395	4	2
1930	2	22.0143	-1.18048	2	2
1931	2	23.58	-0.780186	3	2
1932	2	20.5656	-1.60259	4	2
1933	1	24.3277	-0.60774	0	1
1934	2	25.7429	-0.332537	0	2
1935	2	30.314	0.448496	2	2
1936	2	38.7366	1.42768	5	2
1937	1	29.0252	0.253342	4	1
1938	2	23.71	-0.752312	2	2
1939	2	26.5007	-0.190081	0	2
1940	2	38.756	1.42855	0	2
1941	2	33.28	0.825028	0	2
1942	1	31.38	0.589818	0	1
1943	2	38.11	1.36585	5	2
1944	2	24.7996	-0.509918	2	2
1945	2	23.9933	-0.690185	1	2
1946	2	21.2822	-1.39651	0	2
1947	2	27.18	-0.0683087	0	2
1948	1	27.256	-0.0574211	2	1
1949	2	52.9377	2.61744	6	2
1950	1	31.1361	0.56106	0	1
1951	2	24.6967	-0.530329	1	2
1952	1	25.7944	-0.31719	0	1
1953	2	27.7325	0.0298597	0	2
1954	2	23.7	-0.755255	1	2
1955	1	30.849	0.520036	2	1
1956	2	19.0533	-2.12577	7	2
1957	2	30.8729	0.522574	0	2
1958	1	27.3194	-0.0451675	3	1
1959	1	31.375	0.589065	0	1
1960	1	22.135	-1.15031	2	1
1961	1	25.4869	-0.379977	1	1
1962	1	30.5152	0.474313	0	1
1963	2	44.4264	1.94489	3	2
1964	2	43.2658	1.83208	3	2
1965	2	21.5667	-1.32212	5	2
1966	1	36.6182	1.20584	6	1
1967	2	25.5	-0.377937	0	2
1968	2	21.0925	-1.44574	5	2
1969	1	20.4496	-1.63184	6	1
1970	1	26.3865	-0.21215	0	1
1971	2	28.3219	0.140347	6	2
1972	2	21.62	-1.30537	0	2
1973	1	25.5466	-0.366856	2	1
1974	2	31.03	0.548632	0	2
1975	1	26.8833	-0.113652	0	1
1976	2	27.8217	0.0454843	0	2
1977	1	25.552	-0.365728	0	1
1978	1	25.0902	-0.444417	4	1
1979	2	22.6525	-1.00794	0	2
1980	2	30.5445	0.481408	2	2
1981	2	23.5264	-0.793702	0	2
1982	2	17.4727	-2.77665	0	2
1983	2	20.3327	-1.67359	0	2
1984	1	31.4068	0.593086	2	1
1985	2	42.5136	1.76411	6	2
1986	2	35.8998	1.12592	0	2
1987	1	22.785	-0.97704	1	1
1988	2	22.86	-0.957336	3	2
1989	2	28.0343	0.08365	2	2
1990	1	20.25	-1.69895	5	1
1991	1	27.1246	-0.0756068	1	1
1992	2	31.5309	0.609264	1	2
1993	2	23.465	-0.806488	1	2
1994	2	22.3142	-1.09985	8	2
1995	2	32.0557	0.677522	0	2
1996	1	23.6231	-0.772486	0	1
1997	2	31.4517	0.598377	3	2
1998	2	29.5367	0.333429	2	2
[truncated: 9,883 more rows]
